1 **Title:** Cellular properties of intrinsically photosensitive retinal ganglion cells during postnatal development

2  
3 **Authors:** Jasmine A. Lucas<sup>1</sup> and Tiffany M. Schmidt<sup>1</sup>

4 <sup>1</sup>Department of Neurobiology, Northwestern University, Evanston, IL, USA

5  
6 **Email:** Jasmine A. Lucas ([jasmine.lucas@northwestern.edu](mailto:jasmine.lucas@northwestern.edu)), Dr. Tiffany M. Schmidt  
7 ([tiffany.schmidt@northwestern.edu](mailto:tiffany.schmidt@northwestern.edu))

8  
9 **Corresponding Author:** Dr. Tiffany M. Schmidt ([tiffany.schmidt@northwestern.edu](mailto:tiffany.schmidt@northwestern.edu))

10  
11 **Abstract**

12 *Background:* Melanopsin-expressing, intrinsically photosensitive retinal ganglion cells (ipRGCs) respond directly  
13 to light and have been shown to mediate a broad variety of visual behaviors in adult animals. ipRGCs are also  
14 the first light sensitive cells in the developing retina, and have been implicated in a number of retinal  
15 developmental processes such as pruning of retinal vasculature and refinement of retinofugal projections.  
16 However, little is currently known about the properties of the six ipRGC subtypes during development, and how  
17 these cells act to influence retinal development. We therefore sought to characterize the structure, physiology,  
18 and birthdate of the most abundant ipRGC subtypes, M1, M2, and M4, at discrete postnatal developmental  
19 timepoints.

20 *Methods:* We utilized whole cell patch clamp to measure the electrophysiological and morphological properties  
21 of ipRGC subtypes through postnatal development. We also used EdU labeling to determine the embryonic  
22 timepoints at which ipRGC subtypes terminally differentiate.

23 *Results:* Our data show that ipRGC subtypes are distinguishable from each other early in postnatal development.  
24 Additionally, we find that while ipRGC subtypes terminally differentiate at similar embryonic stages, the subtypes  
25 reach adult-like morphology and physiology at different developmental timepoints.

26 *Conclusions:* This work provides a broad assessment of ipRGC morphological and physiological properties  
27 during the postnatal stages at which they are most influential in modulating retinal development, and lays the

28 groundwork for further understanding of the specific role of each ipRGC subtype in influencing retinal and  
29 visual system development.

30  
31 **Keywords: Melanopsin, ipRGCs, retinal development, retinal ganglion cell, retina**

32  
33 **Background**

34 Melanopsin-expressing, intrinsically photosensitive retinal ganglion cells (ipRGCs) represent a class of non-  
35 canonical, ganglion cell photoreceptors. These cells influence a variety of visual behaviors including contrast  
36 sensitivity (1), circadian photoentrainment (2-4), sleep (5, 6), and even mood (7, 8). These wide-ranging  
37 behavioral influences are attributed to the multiple subtypes (M1-6) that comprise the ipRGC population, with  
38 different subtypes possessing a unique complement of cellular properties and playing distinct roles in vision. For  
39 example, the M1 ipRGC subtype has been linked to subconscious, non-image forming behaviors including  
40 circadian photoentrainment, the pupillary light reflex, and even regulation of mood and learning. The M4 ipRGCs,  
41 in comparison, are important for proper contrast sensitivity in visual perception (1, 9).

42  
43 Although ipRGCs have been categorized based on their adult characteristics, they are in fact light sensitive from  
44 embryonic stages (10-12) and begin to exhibit diverse light response properties at early postnatal stages (13,  
45 14). Thus, these unique photoreceptors are light sensitive long before the rest of the retinal circuitry is able to  
46 functionally relay rod/cone signals around ~P12 when the eyes open (15, 16). This early photosensitivity has led  
47 to multiple studies examining potential developmental influences of ipRGCs on the developing retina and visual  
48 system. One study found that melanopsin modulates the branching patterns of retinal vasculature in a light-  
49 dependent manner (10). Other studies revealed that melanopsin and ipRGCs can influence spontaneous retinal  
50 waves (17) and that they are important retinofugal refinement (17, 18). Surprisingly, light and melanopsin can  
51 even drive a light avoidance behavior in neonatal mice as young as 6 days old (19).

52  
53 While it is clear that light is modulating retinal development and even pup behavior through melanopsin, the  
54 circuit mechanisms of these effects remain unclear. In particular, it is not known which of the six ipRGC subtypes  
55 mediate these developmental effects. A first step in determining the role of the ipRGC subtypes in development

is characterizing the developmental time course of the maturation of each cell type. A previous study has revealed that there are at least three physiological ipRGC subtypes during development, type I, II, and III (13). These subtypes were differentiated based on the size and sensitivity of their light responses with follow up studies proposing that the type I corresponds to the adult M4 subtype, type II to the M2 subtype, and type III to the M1 subtype (14, 20). Beyond this, little is known about the structure and function of ipRGC subtypes during development, and yet this information is a necessary first step in understanding the mechanisms by which ipRGCs influence the developing retina. We therefore set out to characterize the morphology, physiology, and developmental “birth” date of the three major ipRGC subtypes, M1, M2, and M4. We found that ipRGC subtypes are differentiable at early postnatal stages and seem to exhibit different rates of maturation. Moreover, we find that while ipRGCs are generally born at similar embryonic time points, their birth is largely complete at timepoints earlier than two groups of conventional RGCs: the OFF alpha RGCs and Brn3a positive RGCs.

## Methods

### Animals

All procedures were approved by the Animal Care and Use Committee at Northwestern University. Both male and female mice were used and are from a mixed B6/129 background. Adult mice were between 30-60 days of age.

### Electrophysiology

We used *Opn4-GFP* (21) mice for all electrophysiological recordings. All mice P14 and under were dark adapted 1-2 hrs prior to recording. Adult mice were dark adapted overnight. Pups aged P10 and under were sacrificed via decapitation. P14 pups and adult mice were euthanized using CO<sub>2</sub> asphyxiation followed by cervical dislocation under dim red illumination. Eyes were enucleated, and retina were dissected under dim red light in carbogenated (95% O<sub>2</sub>-5%CO<sub>2</sub>) Ame’s medium (Sigma, A1420). Retinas were then sliced in half and incubated at 25°C in Ame’s solution for at least 30min. Retinas were mounted ganglion side up on glass bottom recording chamber and anchored using a platinum ring with nylon mesh. Recordings were performed at 24-26 °C with 1-2mL/min flow of Ame’s solution. ipRGCs (GFP positive) were visualized using whole field 480 nm light for less than 30 seconds at  $3.5 \times 10^{17}$  photons/cm<sup>2</sup>s<sup>-1</sup> intensity, and so all properties of ipRGCs were measured in light

84 adapted tissue. Adult M4 cells were targeted using their characteristic large somata and confirmed post-  
85 recording with immunohistochemistry and dendritic stratification.

86

87 Recording pipettes were between 4-8 M $\Omega$  and filled with following internal solution (in mM): 125 K-gluconate, 2  
88 CaCl<sub>2</sub>, 2 MgCl<sub>2</sub>, 10 EGTA, 10 HEPES, 2 Na<sub>2</sub>-ATP, 0.5 Na-GTP, 10 $\mu$ M Alexa Fluor hydrazide 488 (Thermo,  
89 A10436), and 0.3% neurobiotin (Vector, SP-1120-50), pH to 7.2 with KOH.

90

91 After recording, retina pieces were fixed with 4% PFA overnight. Pieces were then washed with PBS, blocked  
92 for 1hr in 0.3% Triton-X, 6% donkey serum at room temp. After block then placed in the following primary for 2  
93 nights. On the third day, retina pieces were washed with PBS and placed into the following secondary solution  
94 for 2hrs at room temperature in the dark. Retinas were then washed and mounted in fluoromount (Sigma,  
95 F4680). See table 1 for specific antibodies and concentrations. All images were captured using a confocal laser  
96 scanning microscope (LSM, DFC 310 FX, Leica) with a 40x oil-immersion objective.

97

### 98 **Inner Plexiform Lamination Analysis**

99 Dendritic arbors from ipRGCs were traced using Fiji plugin software, simple neurite tracer with subsequent  
100 analysis done by using a similar program and methods as described in Nath & Schwartz, 2016 (22, 23).

101

### 102 **Morphological Analysis**

103 FIJI (ImageJ) software was used to analyze cell morphology. For soma diameter measurements, we took a DIC  
104 image of the soma before patching. Using the polygon tool, we traced the entire soma and calculated the  
105 diameter using the circle equation. A similar method was used to calculate dendritic diameter from cell fill images.  
106 We used FIJI plugin, neuronJ, to trace cell fills to get a measurement of total dendritic length. These traced cell  
107 fills were subsequently used for Sholl analysis which was performed using the FIJI software.

108

### 109 **Electrophysiological Analysis**

110  $C_m/R_{inp}$ : Cells were given a 10mV hyperpolarization step in voltage clamp mode. Capacitance and input  
111 resistance were calculated from recorded trace using Ohm's law.

112  $V_m$ : Cells were recorded at rest in current clamp mode for 3 minutes with the last minute of the recording being  
113 averaged to yield the resting membrane potential. Spike frequency was also assessed in the last minute of the  
114 recording.

115 *Depolarizing current injections*: Current was injected to hold cells at -79 mV and cells were then injected with 1s  
116 of +10pA or +20pA stepwise current until cells reached a current that caused depolarization block.

117 *Action Potentials*: For action potential analysis, the first action potential elicited at the lowest depolarizing current  
118 was used for full width half maximum (from threshold), threshold (24), and hyperpolarization analysis.  
119 Hyperpolarization was difference between the threshold and the lowest point following action potential peak.

120 *Light Onset*: Light onset was defined when cell membrane potential reach 50% of maximum light response during  
121 the lights on period.

## 122

### 123 **Statistics**

124 Using Prism graphpad, we analyzed data with non-parametric one-way (Kruskal-Wallis) with Dunn's multiple  
125 comparisons test for any ANOVA that indicated statistical difference. Statistical significance was concluded when  
126  $p < 0.05$ .

### 127

### 128 **Birthdating**

129 We crossed  $Opn4^{Cre/+};ZEG$  to Wildtype mice to generate  $Opn4^{Cre/+};ZEG$  animals and  $Opn4^{LacZ/LacZ}$  to  $Opn4-GFP$   
130 to generate  $Opn4^{LacZ/+};Opn4-GFP$  mice. Male and female mice were house together and female mice were  
131 checked daily for copulation plug. Once plug was confirmed, the potentially pregnant female was separated from  
132 the male and singly housed. On the day before the targeted gestation day, pregnant females were water deprived  
133 for 24hrs. On the targeted gestation day, pregnant females were given 400 $\mu$ L of water containing 30 $\mu$ g/g of EdU  
134 (Abcam, ab146186) every 2 hrs for 12 hours. Gestation day was confirmed when female gave birth on the 19<sup>th</sup>  
135 day.

136

137 EdU mice of the correct genotype were dissected between 30-60 days of age. Mice were euthanized with CO<sub>2</sub>  
138 asphyxiation, followed by cervical dislocation. Eyes were enucleated and retinas were fixed overnight in 4% PFA  
139 at 4°C. The next day retinas were washed with PBS, blocked for 1hr at room temperature in 0.3% Triton-X, 6%

140 goat or donkey serum and then placed into primary solution for 2-3 nights at 4°C. Then retinas were washed with  
 141 PBS and incubated in secondary solution for 2 hours at room temperature. Finally, retinas were washed with  
 142 PBS and click-it reaction was performed according to manufacturer's specifications on flat mounted retina  
 143 (Thermo, C10640). After click-it reaction, retinas were washed with PBS and mounted in fluoromount. See table  
 144 1 for specific antibodies and concentrations. 8 images were acquired at 0.5mm, 1.0mm, and 1.5mm from the  
 145 optic nerve for a total of 24 per retina. All images were captured using a confocal laser scanning microscope  
 146 (LSM, DFC 310 FX, Leica) with a 40x oil-immersion objective.

147  
 148 Table 1: Antibodies for Immunohistochemistry

| Genotype                                                | Primary Solution                                                                                           | Secondary Solution                                                                       |
|---------------------------------------------------------|------------------------------------------------------------------------------------------------------------|------------------------------------------------------------------------------------------|
| <i>Opn4-GFP</i> (post-recording pieces)                 | Streptavidin 488 (Thermo, S11223), mouse anti-SMI32 (BioLegend, 801701), goat anti-ChAT (Milipore, AB144P) | Streptavidin 488, donkey anti-mouse (Thermo, A31571), donkey anti-goat (Thermo, A-11056) |
| <i>Opn4<sup>Cre/+</sup>;ZEG</i>                         | rabbit anti-GFP (Thermo, A11122), mouse anti-SMI32                                                         | goat anti-rabbit (Thermo, A11034), goat anti-mouse (Thermo, A21125)                      |
| <i>Opn4<sup>LacZ/+</sup>;Opn4-GFP</i>                   | chicken anti-Beta galactosidase (Invitrogen, A11132), rabbit anti-GFP                                      | goat anti-chicken (Thermo, SA172000), goat anti-rabbit (Thermo, A-11035)                 |
| <i>Opn4<sup>LacZ/+</sup> &amp; Opn4<sup>Cre/+</sup></i> | Mouse anti-Brn3a (Milipore, MAB1585), goat anti-ChAT                                                       | Donkey anti-mouse, donkey anti-goat                                                      |

149 All primary and secondary solutions are 0.3% Triton-X and 6% goat or donkey serum. With the exception of  
 150 ChAT, all primary and matching secondary were done at 1:500 dilutions. ChAT and corresponding secondary  
 151 were done at 1:250.

## 152 Results

### 154 Morphological properties of ipRGC subtypes during development

155 In order to assess the morphological and physiological properties of ipRGC subtypes during development, we  
156 first needed to confirm that we could reliably identify each subtype at early postnatal stages using criteria  
157 available to differentiate the adult subtypes. We chose to focus on M1, M2, and M4 ipRGCs because the  
158 properties of these subtypes are well characterized and they have been previously shown to tile the retina (25-  
159 27). M1, M2, and M4 ipRGCs can be differentiated by their dendritic stratification in the inner plexiform layer (M1:  
160 OFF stratifying and M2, M4: ON stratifying) and by presence (M4) or absence (M1, M2) of SMI-32  
161 immunolabeling. We therefore first wanted to determine whether we could identify ipRGC subtypes during  
162 postnatal development using these same criteria: M1 ipRGCs, OFF stratifying and SMI-32 negative, M2 ipRGCs,  
163 ON stratifying, SMI-32 negative, and M4 ipRGCs, ON stratifying, SMI-32 positive. We targeted ipRGCs in Opn4-  
164 GFP mice for patch clamp recordings of ipRGCs at P6, P8, P10, P14, and Adult ages and filled cells with  
165 neurobiotin. We then performed immunohistochemistry for SMI-32 and choline acetyltransferase (ChAT),  
166 determined whether each cell was SMI-32 positive and whether it was ON or OFF stratifying (using ChAT bands  
167 as a reference). Using the aforementioned subtyping criteria, we find that we can indeed clearly identify these  
168 three ipRGC subtypes in our earliest time point, postnatal P6 (Figure 1). Interestingly, when we mapped the  
169 lamination patterns of M1, M2, and M4 ipRGCs at P6 and adulthood, we found that all ipRGC subtypes had a  
170 different lamination pattern compared to their adult counterparts with the M1 subtype being most similar to  
171 adulthood (Figure 1B). In contrast, the M2 and M4 subtypes seem to experience a bigger change in lamination  
172 pattern as cells mature. We observed that the M2 ipRGCs stratify closer to the middle of the IPL in early postnatal  
173 development before refining this dendritic lamination to the innermost portion of the IPL in adulthood (Figure 1D)  
174 and that the M4 ipRGCs have dendrites stratifying closer to the ganglion cell layer in early postnatal development  
175 but then moving slightly closer to the middle of the IPL in adulthood (Figure 1F), in agreement with previous  
176 observations of adult M2 and M4 ipRGC morphology (28). These findings suggest that although the M1, M2, and  
177 M4 ipRGCs' dendrites broadly stratify within the correct layer early on, their dendritic stratification undergoes  
178 refinement in later parts of postnatal development.

179  
180 The ability to define ipRGC subtypes early in development affords us the opportunity to characterize the  
181 progression of ipRGC structural and functional development in a way that is not possible for most RGC types.  
182 We first analyzed the morphological changes that occur in each ipRGC subtype during postnatal development.

183 To do this, we filled M1, M2, and M4 ipRGCs with Neurobiotin at P6, 8, 10, 14 and Adult stages. We measured  
184 soma size, dendritic field diameter, and total dendritic length, and performed Sholl analysis to assess the  
185 complexity of the dendritic arbors (Figure 2). We found that soma size remained constant across development  
186 in M1 and M2 ipRGCs, but increased in M4 ipRGCs (Figure 2H). With regards to dendritic field size, we found  
187 that M1 ipRGCs exhibit adult dendritic field size and length by P10 (Figure 2C-D), while M2 ipRGCs mature by  
188 P14 (Figure 2F-G) and M4 ipRGCs continuing to expand their dendritic field size and complexity beyond P14  
189 (Figure 2I-J).

190  
191 In adulthood, M1 ipRGCs have the smallest somata and smallest, least complex dendritic arbors amongst these  
192 three subtypes while M4 ipRGCs have the largest somata, as well as the largest and most complex dendritic  
193 arbors (1, 25, 28) (Figure 3F). We therefore next examined whether the reported morphological differences  
194 between adult ipRGC subtypes could be detected at early postnatal stages (Figure 3). Interestingly, at P8, we  
195 find that M1 ipRGCs have the largest dendritic field diameter while M4 ipRGCs have the smallest, which may be  
196 reflective of a faster rate of maturation for M1 ipRGC morphology (Figure 3A). All three subtypes exhibit similar  
197 total dendritic length at this age while in adulthood M4 cells have the largest total dendritic length of the three  
198 subtypes (Figure 3C-D). Of note, we found a large spread in the morphological measurements for the M1 and  
199 M4 subtypes the adult stage (Figure 4), and so we did not find that the subtypes were significantly different in  
200 dendritic field diameter (Figure 3B), as had been previously reported (1, 25, 28). The M4 variation is likely a  
201 function of the large differences in M4 ipRGC arbors from nasal, where M4 cells are very large, to temporal retina  
202 where M4 cells are very small (29). Additionally, M1 ipRGCs have been reported to show large variation in their  
203 morphological (and biophysical) properties (30). Sholl analyses comparing morphological complexity between  
204 all three subtypes reveals that the M2 and M4 ipRGCs begin to exhibit more complex dendritic arbors than M1  
205 ipRGCs at early postnatal stages (Figures 3E-F).

## 206 207 **Physiological properties of ipRGC subtypes during development**

208 Following morphological analysis, we next characterized the intrinsic physiological properties of M1, M2, and M4  
209 ipRGCs across development. In general, the intrinsic physiological properties of each subtype were relatively  
210 stable across development (Figure 5). We observed that M1 cells have a downward trend in capacitance and



211 input resistance as cells age (Figure 5C-D) while M2 and M4 cells experience a drop in capacitance between  
212 P14 and adult, as well as a downward trend in input resistance as development progresses (Figure 5G-H, K-L).  
213 The variation in capacitance and resistance in particular are likely to be a combination of changes in membrane  
214 surface area, intrinsic membrane properties, and electrical coupling with a surrounding network of cells (31).  
215 When we directly compared the input resistance and resting membrane potential of M1, M2, and M4 ipRGC  
216 subtypes at P8 and Adult ages, we found that M1 cells have a more depolarized resting membrane potential and  
217 higher input resistance even early in development (Figure 6A, C). These differences mimic those previously  
218 observed in light adapted tissue for adult M1 versus M2 and M4 ipRGCs (20, 32) as well as our own observations  
219 (Figure 6B, D).

220  
221 We next compared the spiking properties and action potential waveform of M1, M2, and M4 ipRGCs. We  
222 performed current clamp recordings from each of these subtypes and injected 1s stepwise depolarizing current  
223 of 10 or 20pA until cells reached depolarization block. M1 ipRGCs show very few action potentials evoked by  
224 positive current (Figure 7A-B), as reported previously for light-adapted M1 cells (9, 20). In contrast, the M2 and  
225 M4 subtypes are much more excitable during development with the M4 subtype significantly increasing in  
226 excitability as cells mature (Figure 7A, D, F). Somewhat surprisingly, the current density needed to reach the  
227 maximum spiking frequency was not significantly different across ages (Figure 7C, E, G) for each of the subtypes.  
228 We next analyzed several components of individual action potentials from each subtype including width at half  
229 max, threshold, and fast after hyperpolarization (Figure 8). Unsurprisingly, we find that action potential width at  
230 half-max decreases for all cell types across development (Figure 8B, E, H) which is in line with typical progression  
231 of neuronal development (33, 34). We also observe that threshold decreases for the M2 and M4 subtypes as  
232 cells mature (Figure 8F, I).

233  
234 In addition to the intrinsic properties of M1, M2, and M4 ipRGCs, we also examined the ipRGC light response  
235 across development. We performed current clamp recordings of ipRGC light responses to 30s of saturating blue  
236 light stimulus at  $1 \times 10^{17}$  photons/cm<sup>2</sup>s<sup>-1</sup> at P6, P8, P10, P14, and Adult. In general, we found that all subtypes  
237 exhibited adult-like light responses by P14 (Figure 9), consistent with the intact synaptic circuitry in the retina  
238 around the time of eye opening(15, 16). Specifically, M2 and M4 ipRGCs, which are known to receive strong

239 drive from the cone pathway (1, 28, 35), show faster and larger light responses as development progress (Figure  
240 9D-G). M1 ipRGCs, however, had statistically similar light responses throughout development (Figure 9B-C).  
241 This is in line with previous reports that M1 ipRGCs are strongly driven by melanopsin phototransduction in bright  
242 light (35), and indicates that M1 ipRGCs show mature light responses from early developmental stages. M1 cells  
243 also showed strong depolarization block in their light responses, as reported previously (36). Interestingly, when  
244 we compared ipRGC light responses early in development and adulthood, we observe that while the maximum  
245 depolarization in response to light is similar between all three subtypes in both adulthood and development  
246 (Figure 10A-B), the M1 subtype has a faster onset time early in development, but responds more slowly than  
247 other subtypes in adulthood (Figure 10C-D).

### 249 **Assessing the embryonic birthdate of ipRGC subtypes**

250 Overall, our results suggest that ipRGC subtypes mature at different rates during postnatal development. We  
251 next asked whether these differences in maturation rate might be reflected in differences in cellular birthdate.  
252 That is, do the M1, M2, and M4 subtypes terminally differentiate at different embryonic timepoints, and how does  
253 this compare to the birthdate of conventional RGCs? To answer this, we utilized 5-ethynyl-2'-deoxyuridine (EdU),  
254 a thymidine analog, to label cells that terminally differentiated on specific embryonic days, also known as  
255 birthdating. We first compared the birthdate of all ipRGCs, M1-3 ipRGCs, and Brn3a-positive RGCs (non-  
256 ipRGCs). To do this, we quantified the percentage of cells that were EdU and GFP positive in both *Opn4<sup>Cre/+</sup>*;  
257 *Z/EG* animals (where all ipRGCs are labeled with GFP; Figure 11A) and *Opn4<sup>LacZ/+</sup>*; *Opn4-GFP* animals (where  
258 only M1-M3 ipRGCs are labeled with GFP and only M1 ipRGCs are labeled with LacZ; Figure 11A) from  
259 Embryonic Day E11-14. We also immunostained for a non-ipRGC population of RGC, the Brn3a-positive RGCs  
260 (Figure 11A), and counted the number EdU-positive, Brn3a-positive RGCs from E11-14. While ipRGCs appear  
261 to be born primarily on E11 and E12 (Figure 11B-C), we observed that Brn3a positive RGCs continued to  
262 terminally differentiate at E13 and E14, suggesting that ipRGC birthdates differ from other RGC types.

263  
264 We next wanted to assess and compare the birthdate of individual ipRGC subtypes (M1, M2/3, and M4 ipRGCs).  
265 To identify M4 ipRGCs from “non-M4” ipRGCs, we immunolabeled *Opn4<sup>Cre/+</sup>*; *Z/EG* retinas for SMI-32. M4  
266 ipRGCs are easily identified as GFP positive, SMI-32 positive, while non-M4 ipRGCs are GFP positive, SMI-32

negative (Figure 12B). In this line, OFF alpha RGCs can also be identified as GFP negative, SMI-32 positive. To differentiate M1 and M2/3 ipRGCs, we immunolabeled *Opn4<sup>LacZ/+</sup>; Opn4-GFP* mice for LacZ and GFP. M1 ipRGCs will be both GFP and LacZ positive (Figure 12A), while M2/3 ipRGCs should be GFP positive, LacZ negative (though some M3 ipRGCs may be LacZ positive, see (37); Figure 12A). In agreement with our broad comparisons in Figure 11, we find that M1, M2, and M4 ipRGCs are all primarily born on E11 and E12 (Figure 12C-D). Interestingly, when we compared the birthdate of M4/ON alpha RGCs and OFF alpha RGCs, we find that the OFF alpha RGCs continue to be born through E13 (Figure 12E-F), highlighting an important difference in birthdate between the ON and OFF alpha RGC population, despite these cells being considered part of the same class of (alpha) RGC.

## Discussion

ipRGCs are a diverse class of RGC that influence not only a wide range of visual behaviors, but also several important components of retinal development such as spontaneous retinal waves and pruning of retinal vasculature. While there have been several studies that have looked at ipRGCs during postnatal retinal development, only a few have distinguished amongst ipRGC subtypes. Understanding the properties of ipRGC subtypes throughout development, as we have done in this work, is a crucial first step in defining the mechanisms by which ipRGCs exert their many and varied influences on retinal and visual system development.

### M1 ipRGCs have the largest dendritic field during early postnatal development

In general, we observed that all subtypes have the same upward trend in dendritic field expansion and complexity across early postnatal development. Surprisingly, we found that in early development the M1 subtype had the largest dendritic field and M4 cells had the smallest, despite a reversal of these patterns in adulthood (25, 28). However, we do find that in early development, like in adulthood, M1 cells have the least complex dendritic field (Figure 3; (20, 25, 28, 38)). Overall, our data suggest that the M1 subtype reaches an adult morphology earlier than either M2 or M4 cells. This could be attributed to the fact that M1 dendrites most likely undergo less expansion and branching relative to the M2 and M4 subtypes.

### Physiological properties are largely stable from early developmental stages

295 Unlike with morphology, we see that most of the general rules for physiological differences between the subtypes  
296 in adult animals are also observed in early postnatal stages. For example, the adult M4 subtype has been shown  
297 to be more excitable than M1 and M2 cells (9, 20, 32) and here we report that the M4 subtype is the most  
298 excitable among the three subtypes in both adulthood and during postnatal development (Figure 7). We also  
299 find that, like in adulthood, the M1 subtype has the most depolarized resting membrane potential and largest  
300 input resistance among ipRGC subtypes during early postnatal development (Figure 6; (9, 20, 32)). While it is  
301 expected that physiological properties for ipRGC subtypes would be different from what has been reported in  
302 adulthood, it is interesting that the physiological differences between subtypes remains relatively consistent  
303 through development. These findings support the idea that different subtypes might be influencing different  
304 aspects of retinal development via unique signaling properties and physiological roles. One other interesting  
305 observation that we note is that both input resistance and capacitance decrease in all subtypes as cells mature,  
306 although it is more gradual in the M1 subtype relative the M2 and M4 subtypes (Figure 5). Changes to  
307 capacitance and, to some extent, input resistance are indicative of changes in amount of cellular membrane  
308 surface area. Given that we observe an overall growth of the dendritic field and thus an increase in membrane  
309 for all subtypes, we would expect capacitance to increase as cells mature. The fact that we observe the exact  
310 opposite of this indicates that membrane space must be decreasing in some other way that we did not observe  
311 morphologically. One such way would be changes in electrical coupling between cells, which can influence  
312 capacitance and input resistance. In fact, it has been reported that ipRGCs during development are extensively  
313 coupled (12, 31). While there has yet to be a study that directly looks at how coupling changes in ipRGC subtypes  
314 across development as well as how it differs between subtypes during development, it has been shown that M1  
315 and M2 ipRGCs are coupled to GABAergic and ON displaced amacrine cells in adulthood (38, 39). Similarly,  
316 adult M4 cells have been shown to couple amacrine cells (40). In contrast, work done by Arroyo et al, revealed  
317 that during development, ipRGCs are mostly connected to other retinal ganglion cells and other ipRGCs with low  
318 connectivity to GABAergic and other types of amacrine cells (31). They also showed that the number of cells  
319 that ipRGCs couple to 15 cells on average. In comparison, ipRGCs in adulthood have been found to couple to  
320 5-25 cells with stark differences in number of cells coupled between subtypes (38). Taken together, this suggests  
321 that there is most likely a profound change in coupling between development and adulthood, a phenomenon that

322 has been reported for ON-OFF direction-selective RGCs (41). Further work will need to be done to understand  
323 how the network changes as development progresses and if it changes different from subtype to subtype.

### 325 **Diversity ipRGC light responses during development**

326 Multielectrode array recordings of light responses in P8 retinas were one of the first ways in which it was revealed  
327 that there are multiple subtypes of ipRGCs. Tu et al found that there were three types during development based  
328 on light onset as defined by start of spike output: Type I, slow onset, sensitive, fast offset, Type II, slow onset,  
329 insensitive, slow offset, and Type III, rapid onset, sensitive, very slow offset (13). Follow up studies have  
330 suggested that adult M1 is type III (20) and adult M2 is type II (20) and adult M4 is type I (14). In complement to  
331 this, we used whole cell recording techniques to show that maximum depolarization is similar across subtypes  
332 at P8 and that when we define light onset by time to reach 50% of maximum light response, we find that M1  
333 subtype (Type III) is still the fastest with the M2 (Type II) and M4 (Type I) subtypes having similar onset times  
334 (Figure 10). Combined, this illustrates that while subtypes have similar maximum depolarizations in response to  
335 light, the kinetics of that response are actually very different. This diversity in kinetics and firing frequency gives  
336 rise to the very likely possibility that different subtypes might be modulating different developmental factors in  
337 response to light. However, it is not clear which components of the light response (firing frequency, spike latency,  
338 onset time of maximum response, or absolute maximum depolarization) are important determinants in  
339 modulating different aspects of retinal development in response to light and if the determining feature varies  
340 between light responsive developmental traits. Currently, it seems to be that any or all of the ipRGC subtypes  
341 could be the modulators of retinal vasculature or the prolonging retinal waves in response to light. Genetic models  
342 that allow us to ablate single subtypes or abolish the melanopsin response within a particular subtype will help  
343 resolve the requirements of the melanopsin response as well as which subtypes are necessary for specific  
344 behaviors.

### 346 **ipRGC birthdates diverge from conventional RGCs**

347 Previously, it had been reported that RGCs have different birthdates based on their ganglion cell classification  
348 (42) and that Cdh3 positive RGCs which include a subset of the ipRGC population (43) are born between E10  
349 and E12. Furthermore, it has also been reported that the majority M1 ipRGCs are born between E11 and E12

(44). However, this study counted LacZ+ ipRGCs at P0, a time point at which other subtypes have been reported to express high amounts melanopsin (14). Thus, making it unclear if this was a purely M1 ipRGC population. Nonetheless, it is clear that some ipRGCs are born in the earlier part of retina cell type neurogenesis. Given the morphological and physiological differences within ipRGC subtypes (Figures 3, 6; (20, 25, 28)), we wondered whether non-M1 ipRGCs would also be born in the E11-E12 timeframe or if they would have different birthdates. Our results show that the majority of the M1, M2, and M4 ipRGC subtypes are born in within the E10-E12 timeframe and also reveal that M1, M2, and, M4 ipRGCs are all born at same rate (Figure 12). The study done by Osterhout in 2014 also showed that the time at which an RGC is born can dictate the strategy the cell will employ in axon targeting. ipRGC subtypes each target very different brain regions, with M1 and some M2 ipRGCs targeting non-image forming targets and other M2 and M4 ipRGCs targeting image-forming brain regions (25, 26, 45), indicating that RGCs with different downstream targets are also born at overlapping time points. Interestingly, we also observed that OFF alpha ganglion cells which share the alpha RGC classification with the M4 subtype, show distinctly different birthdating patterns from the ON alpha RGCs. It is possible that these temporal differences in differentiation underlie additional differences in ON versus OFF alpha RGC properties.

## Conclusions

Because most RGC types are identified based on their adult characteristics, following distinct RGC types across development has proven difficult. ipRGCs early expression of melanopsin along with other identification markers provide us a unique opportunity to follow multiple RGC subtypes through development. Leveraging this advantage, we were able to carry out a broad characterization of ipRGC subtypes throughout the developmental timepoints at which they are influencing retinal and visual system development. This study lays the groundwork for future studies into the precise role of each ipRGC subtype in retinal development.

## List of Abbreviations

ipRGC: intrinsically photosensitive retinal ganglion cells

RGC: retinal ganglion cells

ChAT: choline acetyltransferase

IPL: inner plexiform layer

378 GCL: ganglion cell layer

379 INL: inner nuclear layer

380

## 381 **Declarations**

382 *Ethics and consent to participate:* All procedures were approved by the Animal Care and Use Committee at  
383 Northwestern University.

384 *Consent for publication:* N/A

385 *Availability of data and material:* The datasets used and/or analyzed during the current study are available from  
386 the corresponding author on reasonable request.

387 *Competing interests:* N/A

388 *Funding:* This work was funded by an NIH grant 1DP2EY022584, a Sloan Research Fellowship in Neuroscience,  
389 and a Klingenstein-Simons Fellowship in the Neurosciences to TMS, and a Northwestern Graduate School  
390 Fellowship to support JAL.

391 *Authors' contributions:* JAL and TMS designed experiments, wrote paper, and prepared the figures. JAL  
392 collected and analyzed all of the data for the experiments.

393 *Acknowledgements:* We would like to thank Dr. Gregory Schwartz and members of the Schmidt lab for helpful  
394 comments on the manuscript. We would also like to thank Dr. Marla Feller for the gift of the *Opn4-GFP* mice and  
395 Dr. Samer Hattar for the gift of the *Opn4<sup>Cre</sup>* and *Opn4<sup>LacZ</sup>* lines. We would also like to thank David Swygart for  
396 his help with the IPL depth analysis.

397

## 398 **Figure Legends**

399 **Figure 1: M1, M2, and M4 subtypes can be identified using immunohistochemistry and dendritic**  
400 **stratification at P6.** (A) M1 ipRGCs filled with neurobiotin (top panel) at P6 (left) and Adult (right) stages. Cells  
401 were immunolabeled for SMI-32 (bottom panels). M1 ipRGCs are SMI-32 negative. (B) Dendritic depth  
402 measurements for M1 ipRGCs at P6 (yellow) and Adult (red) ages (n = 3 cells/age). (C) M2 ipRGCs filled with  
403 neurobiotin (top panel) at P6 (left) and Adult (right) stages. Cells were immunolabeled for SMI-32 (bottom  
404 panels). M2 ipRGCs are SMI-32 negative. (D) Dendritic depth measurements for M2 ipRGCs at P6 (yellow) and  
405 Adult (red) ages (n = 3 cells/age). (E) M4 ipRGCs filled with neurobiotin (top panel) at P6 (left) and Adult (right)

406 stages. Cells were immunolabeled for SMI-32 (bottom panels). M4 ipRGCs are SMI-32 positive. (F) Dendritic  
407 depth measurements for M4 ipRGCs at P6 (yellow) and Adult (red) ages ( $n = 3$  cells/age). White arrows point to  
408 soma. Dark gray shading indicates ON sublamina, light gray indicates OFF. GCL and IPL refer to middle of  
409 respective cell body layer. Scale bar is  $50\mu\text{m}$ .

411 **Figure 2: Dendritic length and diameter measurements for M1, M2, M4 subtypes during development.** (A)  
412 Representative cell tracings of M1, M2, and M4 subtypes for P6, P8, P10, P14, Adult timepoints (*left*) and  
413 corresponding Sholl analysis for representative cells (*right*). (B-D) Mean  $\pm$  SD M1 ipRGC soma diameter (B),  
414 dendritic field diameter (C), and total dendritic length (D). (E-G) Mean  $\pm$  SD M2 ipRGC soma diameter (E),  
415 dendritic field diameter (F), and total dendritic length (G). (H-J) Mean  $\pm$  SD M4 ipRGC soma diameter (H),  
416 dendritic field diameter (I), and total dendritic length (J). Scale bar is  $50\mu\text{m}$ ,  $n=5-8$  per subtype/age, \* $p<0.05$ ,  
417 \*\* $p<0.01$ , \*\*\* $p<0.001$ , \*\*\*\* $p<0.0001$  when compared to Adult time point.

419 **Figure 3: Comparison of ipRGC subtype morphology at P8 and in Adulthood.** (A-B) Mean  $\pm$  SD dendritic  
420 field diameter at P8 (A) and Adult (B) for M1, M2, and M4 ipRGCs. (C-D) Mean  $\pm$  SD total dendritic length at P8  
421 (C) and Adult (D) for M1, M2, and M4 ipRGCs. (E-F) Mean  $\pm$  SD number of crossings in Sholl analysis of M1,  
422 M2, and M4 ipRGCs at P8 (E) and Adult (F).  $n=5-8$  per subtype/age, \* $p<0.05$ , \*\* $p<0.01$ .

424 **Figure 4: M1 and M4 subtypes have large variation of morphology in adulthood,** *Left*, Representative cell  
425 tracings of small and large Adult cells for the M1, M2, and M4 subtypes. *Right*, Average Sholl analysis for M1,  
426 M2, and M4 subtypes at P6, P8, P10, P14, and Adult. Graphs are Mean  $\pm$  SD,  $n=5-8$  per subtype/age. Scalebar  
427 is  $50\mu\text{m}$ .

429 **Figure 5: Intrinsic physiological properties of ipRGC subtypes across development.** (A-D) Mean  $\pm$  SD M1  
430 ipRGC resting membrane potential (A), spike frequency at rest (B), capacitance (C), and input resistance (D).  
431 (E-H) Mean  $\pm$  SD M2 ipRGC resting membrane potential (E), spike frequency at rest (F), capacitance (G), and  
432 input resistance (H). (I-L) Mean  $\pm$  SD M4 ipRGC resting membrane potential (I), spike frequency at rest (J),  
433 capacitance (K), and input resistance (L).  $n= 5-14$  per subtype/age \* $p<0.05$  when compared to Adult time point.



434

435 **Figure 6: ipRGC subtypes exhibit distinct intrinsic properties from early postnatal development. (A-B)**

436 Mean  $\pm$  SD resting membrane potential at P8 (A) and Adult (B) for M1, M2, and M4 ipRGCs. (C-D) Mean  $\pm$  SD

437 input resistance at P8 (C) and Adult (D) for M1, M2, and M4 ipRGCs. n= 5-14 per subtype/age, \*p<0.05, \*\*p<0.01,

438 \*\*\*p<0.001.

439

440 **Figure 7: ipRGC subtype excitability across development. (A)** Representative traces from depolarizing

441 current injection that elicited the maximum spike output for M1, M2, and M4 subtypes at P6, P14, and Adult

442 timepoints. (B-C) Maximum spike frequency elicited by depolarizing current steps (B) and maximum current

443 density required to elicit maximum firing frequency (C) in M1 ipRGCs. (D-E) Maximum spike frequency elicited

444 by depolarizing current steps (D) and maximum current density required to elicit maximum firing frequency (E)

445 in M2 ipRGCs. (F-G) Maximum spike frequency elicited by depolarizing current steps (F) and maximum current

446 density required to elicit maximum firing frequency (G) in M4 ipRGCs. Graphs are Mean  $\pm$  SD, n=5-14 per

447 subtype/age, \*p<0.05 when compared to Adult timepoint.

448

449 **Figure 8: Action potential properties of ipRGC subtypes across development. (A)** Representative traces of

450 single action potentials for M1, M2, and M4 subtypes for P6 and Adult timepoints. (B-D) Measurement of M1

451 ipRGC AP full width at half max (B), AP threshold (C), and AP AHP (D). AP AHP P6 for M1 subtype is not plotted

452 because cells did not hyperpolarize after action potential elicitation. (E-G) Measurement of M2 ipRGC AP full

453 width at half max (E), AP threshold (F), and AP AHP (G). (H-J) Measurement of M4 ipRGC AP full width at half

454 max (H), AP threshold (I), and AP AHP (J). Graphs are Mean  $\pm$  SD, n=5-14 per subtype/age, \*p<0.05 when

455 compared to Adult timepoint. AP: action potential, AHP: after hyperpolarization. Blue arrow indicates width at

456 half-max, red dotted line indicates threshold, and black arrowhead indicates after hyperpolarization.

457

458 **Figure 9: ipRGCs light responses across development. (A)** Representative light response traces from M1,

459 M2, and M4 cells at P6, P8, P10, P14, and Adult timepoints. Blue rectangle indicates start and end of light

460 stimulus. Black dotted line indicates -65 mV. (B-C) M1 ipRGC maximum light response (B) and light onset (C).

461 (D-E) M2 ipRGC maximum light response (D) and light onset (E). (F-G) M4 ipRGC maximum light response (F)

462 and light onset (G). Light onset was defined by time to reach 50% of maximum depolarization. Graphs are Mean  
463  $\pm$  SD, n=5-14 per subtype/age, \*p<0.05, \*\*p<0.01 when compared to Adult time point.

464  
465 **Figure 10: Comparison of light response properties of ipRGC subtypes across development.** (A-B)

466 Maximum light response of M1, M2, and M4 ipRGC subtypes at P8 (A) and Adult (B). (C-D) Light onset for M1,  
467 M2, and M4 ipRGC subtypes at P8 (C) and Adult (D). Light onset was defined by time to reach 50% of maximum  
468 depolarization. Graphs are Mean  $\pm$  SD, n=5-14 per subtype/age, \*p<0.05.

469  
470 **Figure 11: ipRGCs are born earlier than Brn3a positive RGCs.** (A), *Top*, GFP or Brn3a immunohistochemistry

471 (green) of retinas from Adult *Opn4<sup>Cre/+</sup>;ZEG*, *Opn4<sup>LacZ/+</sup>*; *Opn4-GFP* and *Opn4<sup>Cre/+</sup>* animals exposed to EdU  
472 (magenta) at different developmental stages. White arrow heads point to examples cells co-labeled with GFP or  
473 Brn3a and EdU. *Bottom*, Schematic of cell types labeled green in each experiment. (B) Accumulation plot of  
474 proportion of ipRGCs or Brn3a RGCs that are EdU positive when exposed to EdU at different embryonic  
475 timepoints. Accumulation was calculated based on adding together the proportion data calculated for each  
476 timepoint. (C) Proportion of ipRGCs or Brn3a RGCs that are EdU positive when exposed to EdU on specific  
477 embryonic day. Graphs are Mean  $\pm$  SD, n=3-4 retinas per timepoint. Scale bar is 100 $\mu$ m.

478  
479 **Figure 12: ipRGC subtypes are born at the same rate and frequency.** (A) *Top*, GFP (green) and LacZ (cyan)

480 immunohistochemistry in Adult *Opn4<sup>LacZ/+</sup>*; *Opn4-GFP* retinas labeled for EdU (magenta). Yellow arrowheads  
481 point to EdU positive M1 cells (GFP+, LacZ+) and white arrows to EdU-positive M2 cells (GFP+, LacZ-). *Bottom*,  
482 Schematic of ipRGC subtypes labeled with each marker in experiment. (B) GFP (green) and SMI-32 (red)  
483 immunohistochemistry in Adult *Opn4<sup>Cre/+</sup>;ZEG* retinas labeled for EdU (magenta). Blue arrowheads indicate EdU-  
484 positive M4 cells (GFP+, SMI-32+), yellow arrows indicate EdU positive non-M4 ipRGCs (GFP+, SMI-32-), and  
485 grey arrowheads indicate EdU positive OFF-alpha RGCs (GFP-, SMI-32+). *Bottom*, Schematic of ipRGC  
486 subtypes labeled with each marker in experiment. (C) Accumulation plot of proportion of ipRGC subtypes that  
487 are EdU positive when exposed to EdU at different embryonic timepoints. Accumulation was calculated based  
488 on adding together the proportion data calculated for each timepoint. (D) Proportion of ipRGC subtypes that are  
489 EdU positive when exposed to EdU at specific embryonic timepoints. (E) Accumulation plot of proportion of M4

490 ipRGCs, non-M4 ipRGCs, and OFF alpha RGCs that are EdU positive when exposed to EdU at different  
491 embryonic timepoints. Accumulation was calculated based on adding together the proportion data calculated for  
492 each timepoint. (F) Proportion of M4 ipRGCs, non-M4 ipRGCs, and OFF alpha RGCs that are EdU positive when  
493 exposed to EdU at specific embryonic timepoints. Graphs are Mean  $\pm$  SD, n=3-4 retinas per timepoint. Scale bar  
494 is 100 $\mu$ m.

## 496 References

- 497 1. Schmidt TM, Alam NM, Chen S, Kofuji P, Li W, Prusky GT, et al. A role for melanopsin in alpha retinal  
498 ganglion cells and contrast detection. *Neuron*. 2014;82(4):781-8.
- 499 2. Hattar S, Lucas RJ, Mrosovsky N, Thompson S, Douglas RH, Hankins MW, et al. Melanopsin and rod-  
500 cone photoreceptive systems account for all major accessory visual functions in mice. *Nature*.  
501 2003;424(6944):76-81.
- 502 3. Lucas RJ, Hattar S, Takao M, Berson DM, Foster RG, Yau KW. Diminished pupillary light reflex at high  
503 irradiances in melanopsin-knockout mice. *Science (New York, NY)*. 2003;299(5604):245-7.
- 504 4. Hattar S, Liao HW, Takao M, Berson DM, Yau KW. Melanopsin-containing retinal ganglion cells:  
505 architecture, projections, and intrinsic photosensitivity. *Science (New York, NY)*. 2002;295(5557):1065-70.
- 506 5. Altimus CM, Guler AD, Villa KL, McNeill DS, Legates TA, Hattar S. Rods-cones and melanopsin detect  
507 light and dark to modulate sleep independent of image formation. *Proceedings of the National Academy of*  
508 *Sciences of the United States of America*. 2008;105(50):19998-20003.
- 509 6. LeGates TA, Fernandez DC, Hattar S. Light as a central modulator of circadian rhythms, sleep and  
510 affect. *Nature reviews Neuroscience*. 2014;15(7):443-54.
- 511 7. Fernandez DC, Fogerson PM, Lazzerini Ospri L, Thomsen MB, Layne RM, Severin D, et al. Light  
512 Affects Mood and Learning through Distinct Retina-Brain Pathways. *Cell*. 2018;175(1):71-84.e18.
- 513 8. LeGates TA, Altimus CM, Wang H, Lee HK, Yang S, Zhao H, et al. Aberrant light directly impairs mood  
514 and learning through melanopsin-expressing neurons. *Nature*. 2012;491(7425):594-8.
- 515 9. Sonoda T, Lee SK, Birnbaumer L, Schmidt TM. Melanopsin Phototransduction Is Repurposed by  
516 ipRGC Subtypes to Shape the Function of Distinct Visual Circuits. *Neuron*. 2018;99(4):754-67.e4.
- 517 10. Rao S, Chun C, Fan J, Kofron JM, Yang MB, Hegde RS, et al. A direct and melanopsin-dependent fetal  
518 light response regulates mouse eye development. *Nature*. 2013;494(7436):243-6.
- 519 11. Vemaraju S, Nayak G, Miller WE, Copenhagen DR, Lang RA. Fetal stage melanopsin (OPN4) and  
520 GNAQ (G $\alpha$ q) signaling regulates vascular development of the eye. 2019:537225.
- 521 12. Sekaran S, Lupi D, Jones SL, Sheely CJ, Hattar S, Yau KW, et al. Melanopsin-dependent  
522 photoreception provides earliest light detection in the mammalian retina. *Current biology : CB*.  
523 2005;15(12):1099-107.
- 524 13. Tu DC, Zhang D, Demas J, Slutsky EB, Provencio I, Holy TE, et al. Physiologic diversity and  
525 development of intrinsically photosensitive retinal ganglion cells. *Neuron*. 2005;48(6):987-99.
- 526 14. Sexton TJ, Bleckert A, Turner MH, Van Gelder RN. Type I intrinsically photosensitive retinal ganglion  
527 cells of early post-natal development correspond to the M4 subtype. *Neural development*. 2015;10:17.
- 528 15. Tian N, Copenhagen DR. Visual stimulation is required for refinement of ON and OFF pathways in  
529 postnatal retina. *Neuron*. 2003;39(1):85-96.
- 530 16. Sernagor E, Eglén SJ, Wong RO. Development of retinal ganglion cell structure and function. *Progress*  
531 *in retinal and eye research*. 2001;20(2):139-74.
- 532 17. Renna JM, Weng S, Berson DM. Light acts through melanopsin to alter retinal waves and segregation  
533 of retinogeniculate afferents. *Nature neuroscience*. 2011;14(7):827-9.
- 534 18. Chew KS, Renna JM, McNeill DS, Fernandez DC, Keenan WT, Thomsen MB, et al. A subset of  
535 ipRGCs regulates both maturation of the circadian clock and segregation of retinogeniculate projections in  
536 mice. *eLife*. 2017;6.

- 537 19. Johnson J, Wu V, Donovan M, Majumdar S, Renteria RC, Porco T, et al. Melanopsin-dependent light  
538 avoidance in neonatal mice. *Proceedings of the National Academy of Sciences of the United States of*  
539 *America*. 2010;107(40):17374-8.
- 540 20. Schmidt TM, Kofuji P. Functional and morphological differences among intrinsically photosensitive  
541 retinal ganglion cells. *The Journal of neuroscience : the official journal of the Society for Neuroscience*.  
542 2009;29(2):476-82.
- 543 21. Schmidt TM, Taniguchi K, Kofuji P. Intrinsic and extrinsic light responses in melanopsin-expressing  
544 ganglion cells during mouse development. *Journal of neurophysiology*. 2008;100(1):371-84.
- 545 22. Nath A, Schwartz GW. Cardinal Orientation Selectivity Is Represented by Two Distinct Ganglion Cell  
546 Types in Mouse Retina. *The Journal of neuroscience : the official journal of the Society for Neuroscience*.  
547 2016;36(11):3208-21.
- 548 23. Sumbul U, Zlateski A, Vishwanathan A, Masland RH, Seung HS. Automated computation of arbor  
549 densities: a step toward identifying neuronal cell types. *Frontiers in neuroanatomy*. 2014;8:139.
- 550 24. Jenerick H. PHASE PLANE TRAJECTORIES OF THE MUSCLE SPIKE POTENTIAL. *Biophysical*  
551 *journal*. 1963;3:363-77.
- 552 25. Ecker JL, Dumitrescu ON, Wong KY, Alam NM, Chen SK, LeGates T, et al. Melanopsin-expressing  
553 retinal ganglion-cell photoreceptors: cellular diversity and role in pattern vision. *Neuron*. 2010;67(1):49-60.
- 554 26. Hattar S, Kumar M, Park A, Tong P, Tung J, Yau KW, et al. Central projections of melanopsin-  
555 expressing retinal ganglion cells in the mouse. *The Journal of comparative neurology*. 2006;497(3):326-49.
- 556 27. Berson DM, Castrucci AM, Provencio I. Morphology and mosaics of melanopsin-expressing retinal  
557 ganglion cell types in mice. *The Journal of comparative neurology*. 2010;518(13):2405-22.
- 558 28. Estevez ME, Fogerson PM, Ilardi MC, Borghuis BG, Chan E, Weng S, et al. Form and function of the  
559 M4 cell, an intrinsically photosensitive retinal ganglion cell type contributing to geniculocortical vision. *The*  
560 *Journal of neuroscience : the official journal of the Society for Neuroscience*. 2012;32(39):13608-20.
- 561 29. Bleckert A, Schwartz GW, Turner MH, Rieke F, Wong RO. Visual space is represented by nonmatching  
562 topographies of distinct mouse retinal ganglion cell types. *Current biology : CB*. 2014;24(3):310-5.
- 563 30. Emanuel AJ, Kapur K, Do MTH. Biophysical Variation within the M1 Type of Ganglion Cell  
564 Photoreceptor. *Cell reports*. 2017;21(4):1048-62.
- 565 31. Arroyo DA, Kirkby LA, Feller MB. Retinal Waves Modulate an Intraretinal Circuit of Intrinsically  
566 Photosensitive Retinal Ganglion Cells. *The Journal of neuroscience : the official journal of the Society for*  
567 *Neuroscience*. 2016;36(26):6892-905.
- 568 32. Hu C, Hill DD, Wong KY. Intrinsic physiological properties of the five types of mouse ganglion-cell  
569 photoreceptors. *Journal of neurophysiology*. 2013;109(7):1876-89.
- 570 33. Dallman JE, Dorman JB, Moody WJ. Action potential waveform voltage clamp shows significance of  
571 different Ca<sup>2+</sup> channel types in developing ascidian muscle. *The Journal of physiology*. 2000;524 Pt 2:375-86.
- 572 34. Picken Bahrey HL, Moody WJ. Early development of voltage-gated ion currents and firing properties in  
573 neurons of the mouse cerebral cortex. *Journal of neurophysiology*. 2003;89(4):1761-73.
- 574 35. Schmidt TM, Kofuji P. Differential cone pathway influence on intrinsically photosensitive retinal ganglion  
575 cell subtypes. *The Journal of neuroscience : the official journal of the Society for Neuroscience*.  
576 2010;30(48):16262-71.
- 577 36. Milner ES, Do MTH. A Population Representation of Absolute Light Intensity in the Mammalian Retina.  
578 *Cell*. 2017;171(4):865-76.e16.
- 579 37. Pires SS, Hughes S, Turton M, Melyan Z, Peirson SN, Zheng L, et al. Differential expression of two  
580 distinct functional isoforms of melanopsin (Opn4) in the mammalian retina. *The Journal of neuroscience : the*  
581 *official journal of the Society for Neuroscience*. 2009;29(39):12332-42.
- 582 38. Muller LP, Do MT, Yau KW, He S, Baldrige WH. Tracer coupling of intrinsically photosensitive retinal  
583 ganglion cells to amacrine cells in the mouse retina. *The Journal of comparative neurology*.  
584 2010;518(23):4813-24.
- 585 39. Reifler AN, Chervenak AP, Dolikian ME, Benenati BA, Li BY, Wachter RD, et al. All spiking, sustained  
586 ON displaced amacrine cells receive gap-junction input from melanopsin ganglion cells. *Current biology : CB*.  
587 2015;25(21):2763-73.
- 588 40. Volgyi B, Abrams J, Paul DL, Bloomfield SA. Morphology and tracer coupling pattern of alpha ganglion  
589 cells in the mouse retina. *The Journal of comparative neurology*. 2005;492(1):66-77.
- 590 41. Xu Z, Zeng Q, Shi X, He S. Changing coupling pattern of The ON-OFF direction-selective ganglion cells  
591 in early postnatal mouse retina. *Neuroscience*. 2013;250:798-808.

- 592 42. Osterhout JA, El-Danaf RN, Nguyen PL, Huberman AD. Birthdate and outgrowth timing predict cellular  
593 mechanisms of axon target matching in the developing visual pathway. *Cell reports*. 2014;8(4):1006-17.
- 594 43. Osterhout JA, Josten N, Yamada J, Pan F, Wu SW, Nguyen PL, et al. Cadherin-6 mediates axon-target  
595 matching in a non-image-forming visual circuit. *Neuron*. 2011;71(4):632-9.
- 596 44. McNeill DS, Sheely CJ, Ecker JL, Badea TC, Morhardt D, Guido W, et al. Development of melanopsin-  
597 based irradiance detecting circuitry. *Neural development*. 2011;6:8.
- 598 45. Chen SK, Badea TC, Hattar S. Photoentrainment and pupillary light reflex are mediated by distinct  
599 populations of ipRGCs. *Nature*. 2011;476(7358):92-5.
- 600

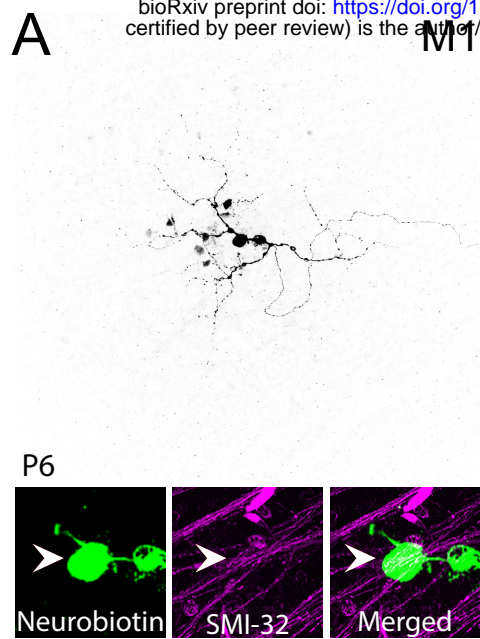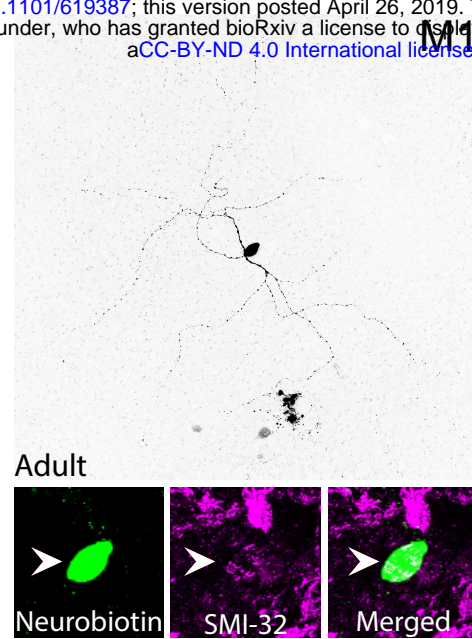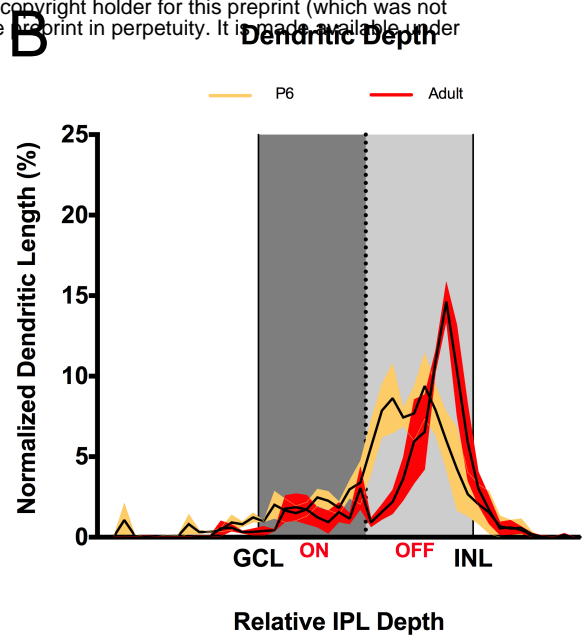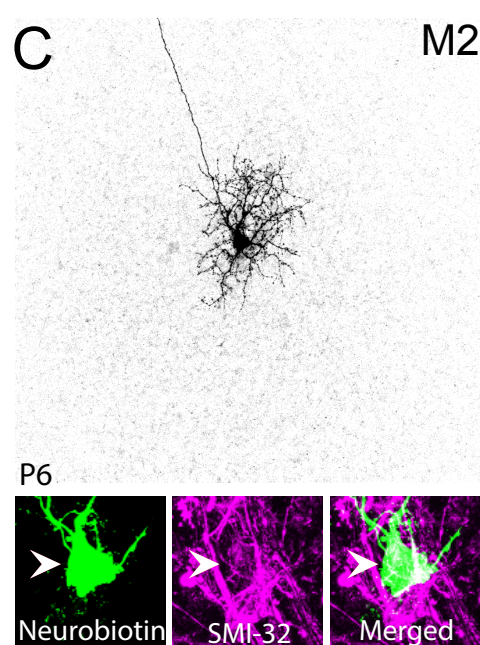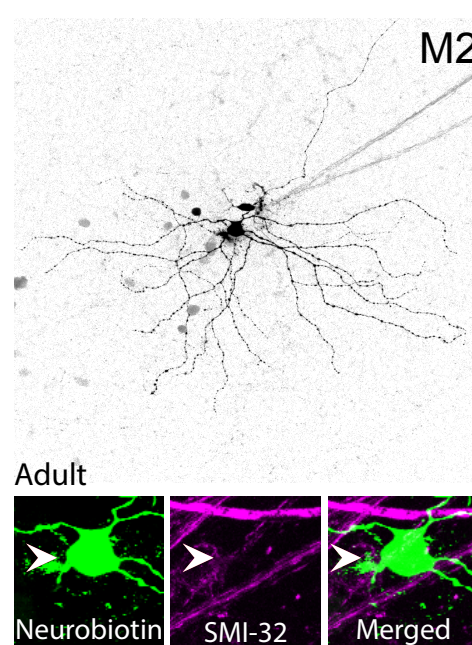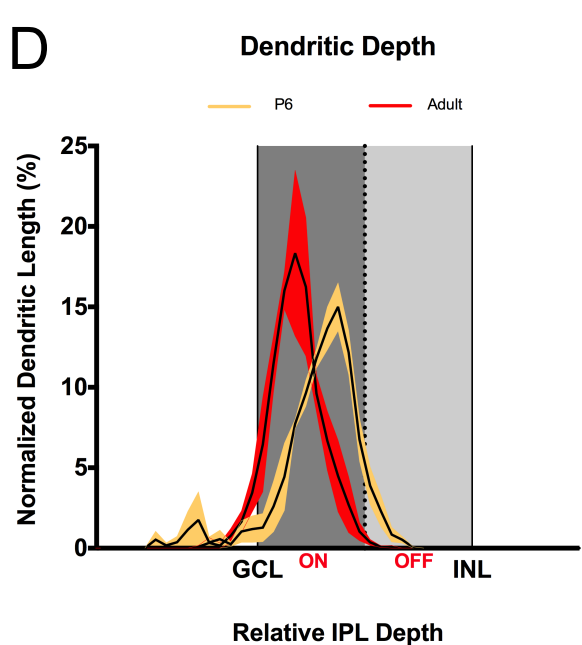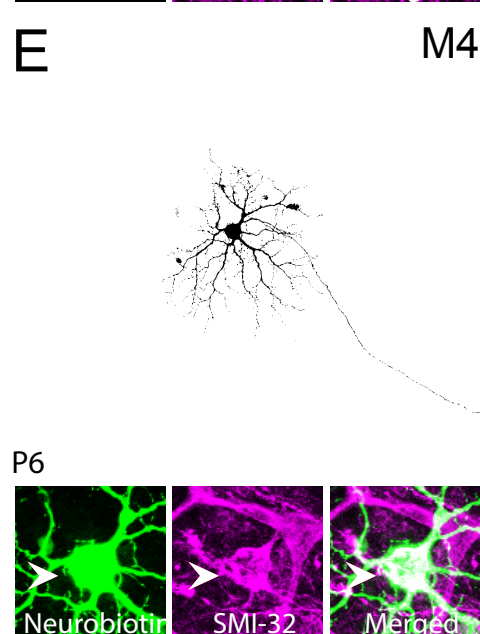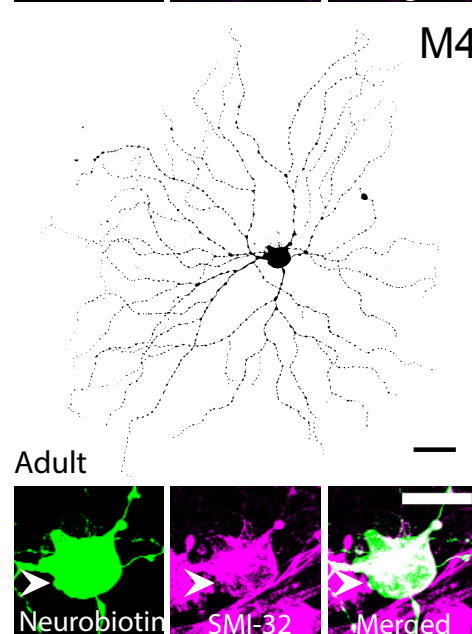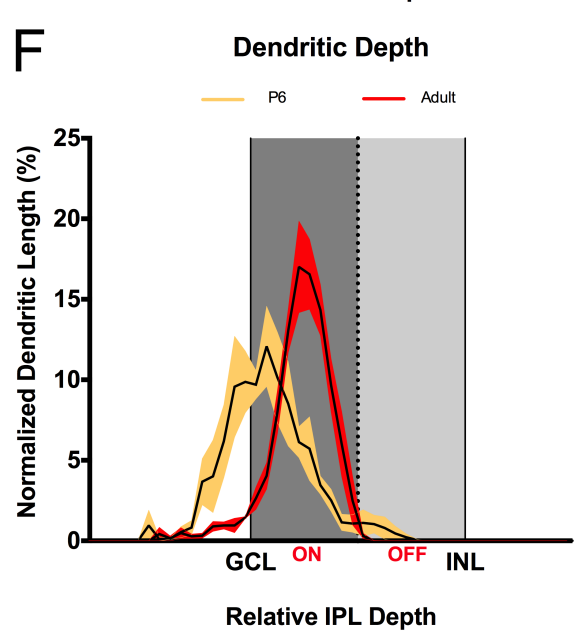

**Figure 1: M1, M2, and M4 subtypes can be identified using immunohistochemistry and dendritic stratification at P6.** (A) M1 ipRGCs filled with neurobiotin (top panel) at P6 (left) and Adult (right) stages. Cells were immunolabeled for SMI-32 (bottom panels). M1 ipRGCs are SMI-32 negative. (B) Dendritic depth measurements for M1 ipRGCs at P6 (yellow) and Adult (red) ages (n = 3 cells/age). (C) M2 ipRGCs filled with neurobiotin (top panel) at P6 (left) and Adult (right) stages. Cells were immunolabeled for SMI-32 (bottom panels). M2 ipRGCs are SMI-32 negative. (D) Dendritic depth measurements for M2 ipRGCs at P6 (yellow) and Adult (red) ages (n = 3 cells/age). (E) M4 ipRGCs filled with neurobiotin (top panel) at P6 (left) and Adult (right) stages. Cells were immunolabeled for SMI-32 (bottom panels). M4 ipRGCs are SMI-32 positive. (F) Dendritic depth measurements for M4 ipRGCs at P6 (yellow) and Adult (red) ages (n = 3 cells/age). White arrows point to soma. Dark gray shading indicates ON sublamina, light gray indicates OFF. GCL and IPL refer to middle of respective cell body layer. Scale bar is 50 $\mu$ m.

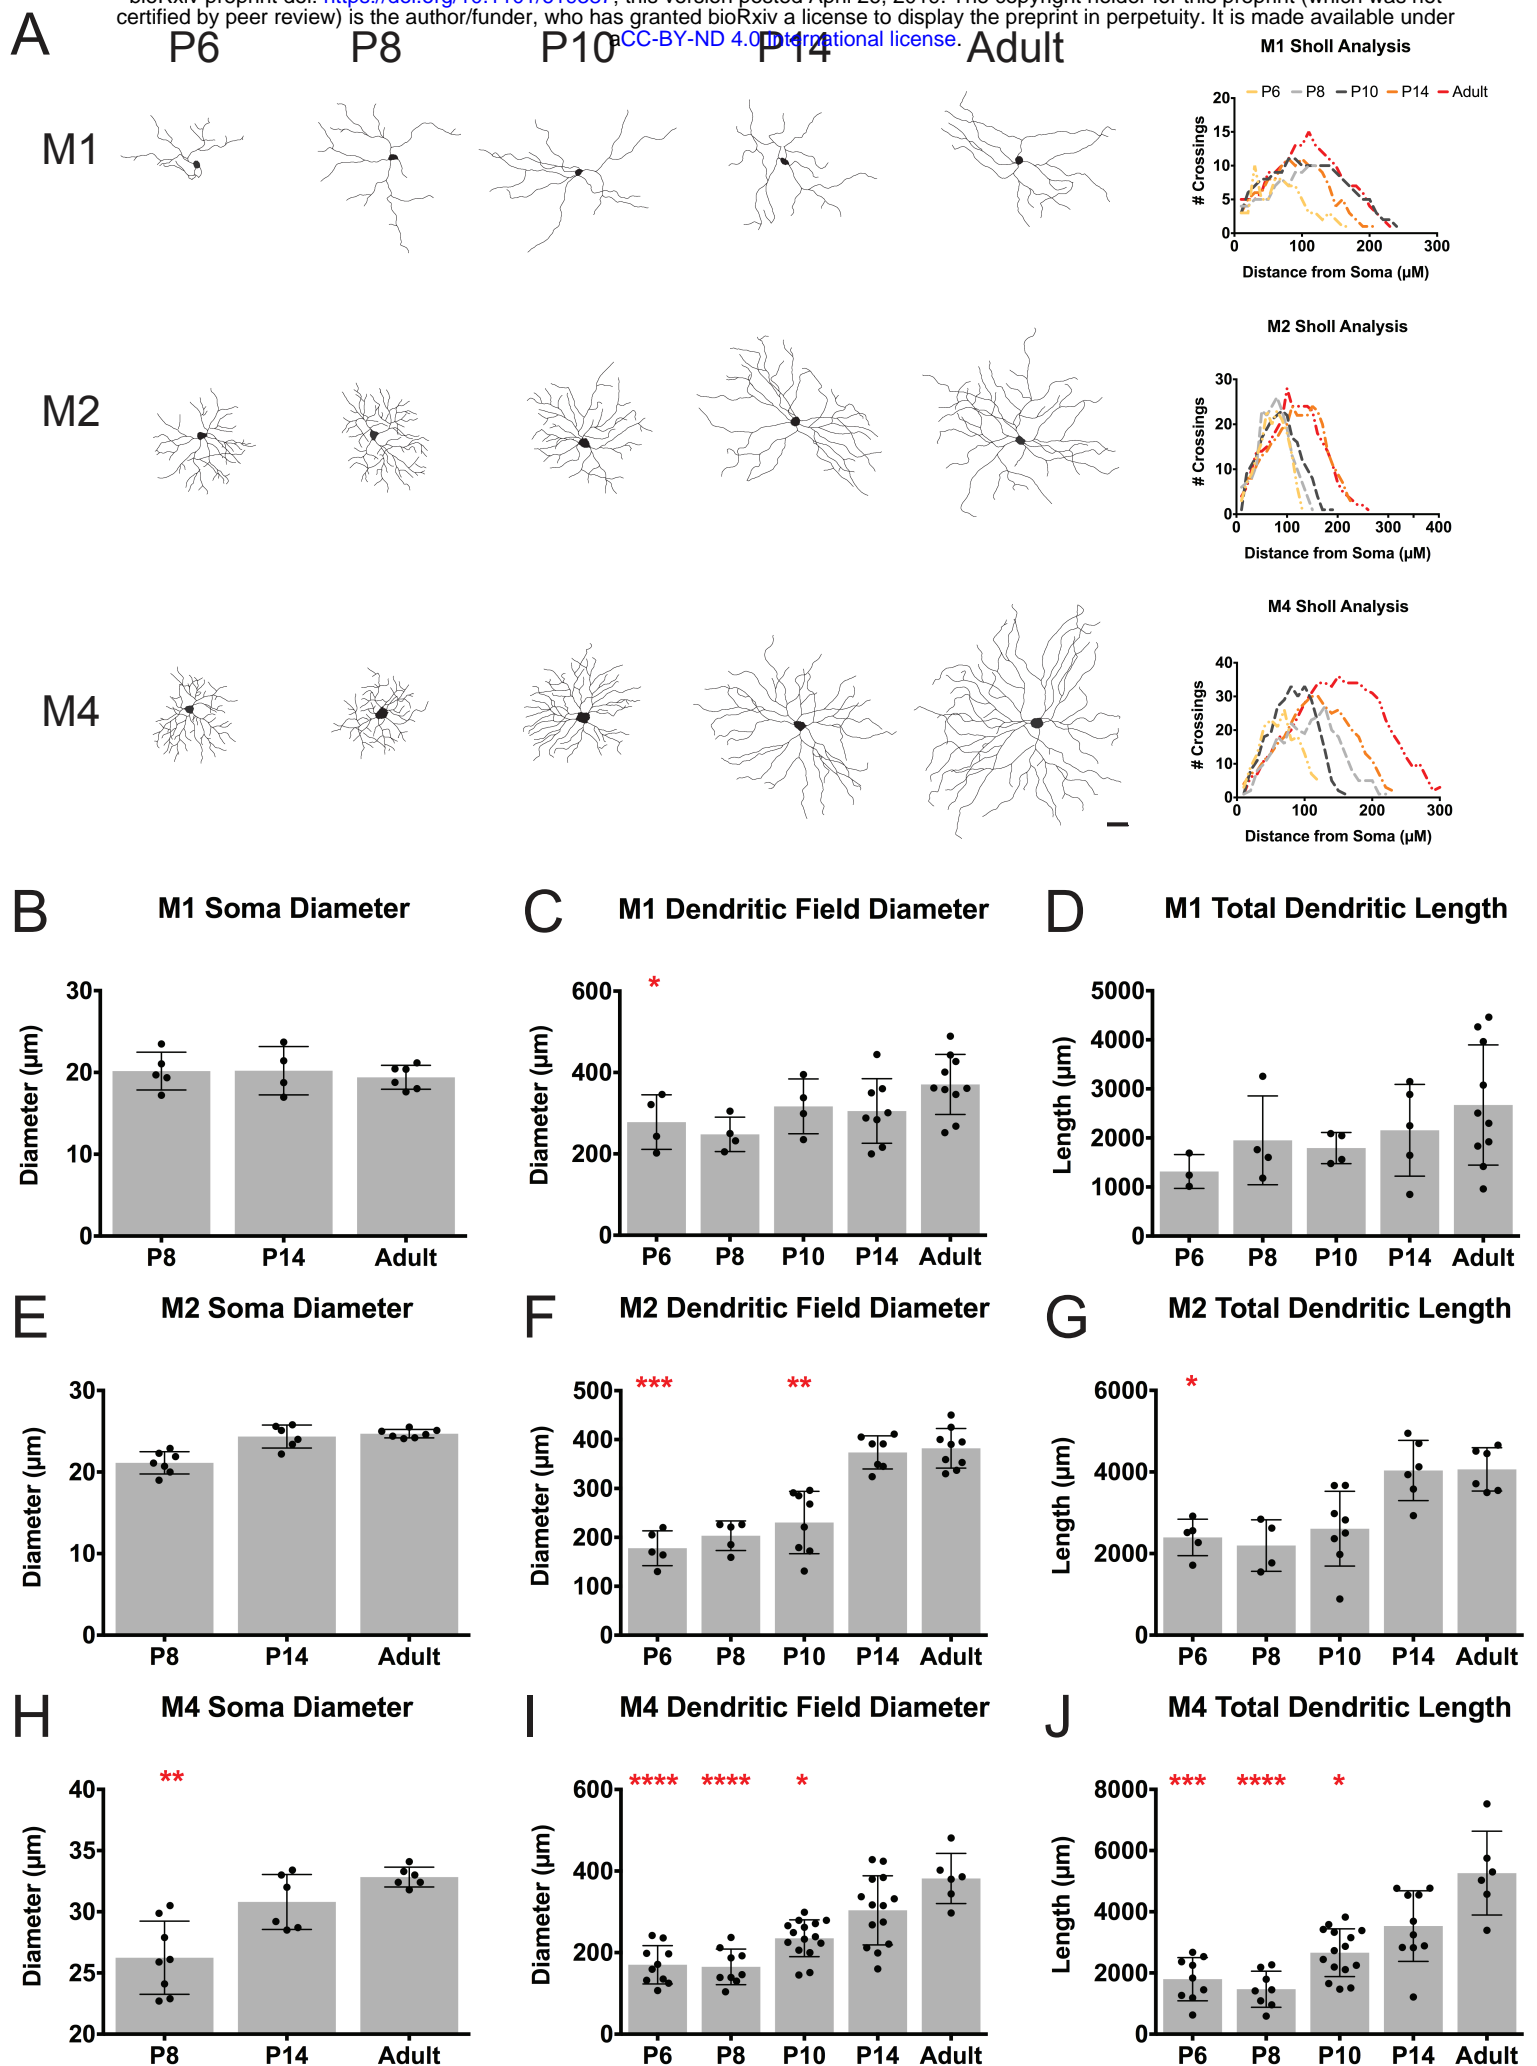



**Figure 2: Dendritic length and diameter measurements for M1, M2, M4 subtypes during development.** (A) Representative cell tracings of M1, M2, and M4 subtypes for P6, P8, P10, P14, Adult timepoints (left) and corresponding Sholl analysis for representative cells (right). (B-D) Mean  $\pm$  SD M1 ipRGC soma diameter (B), dendritic field diameter (C), and total dendritic length (D). (E-G) Mean  $\pm$  SD M2 ipRGC soma diameter (E), dendritic field diameter (F), and total dendritic length (G). (H-J) Mean  $\pm$  SD M4 ipRGC soma diameter (H), dendritic field diameter (I), and total dendritic length (J). Scale bar is 50 $\mu$ m, n=5-8 per subtype/age, \*p<0.05, \*\*p<0.01, \*\*\*p<0.001, \*\*\*\*p<0.0001 when compared to Adult time point.

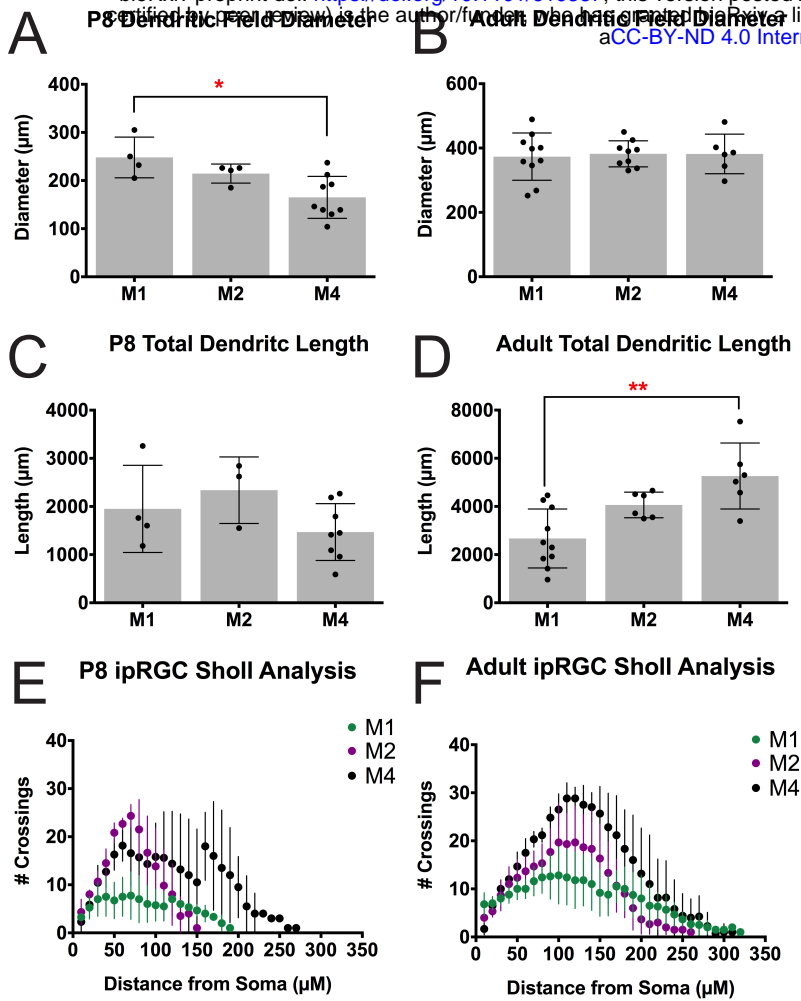

**Figure 3: Comparison of ipRGC subtype morphology at P8 and in Adulthood.** (A-B) Mean  $\pm$  SD dendritic field diameter at P8 (A) and Adult (B) for M1, M2, and M4 ipRGCs. (C-D) Mean  $\pm$  SD total dendritic length at P8 (C) and Adult (D) for M1, M2, and M4 ipRGCs. (E-F) Mean  $\pm$  SD number of crossings in Sholl analysis of M1, M2, and M4 ipRGCs at P8 (E) and Adult (F). n=5-8 per subtype/age, \*p<0.05, \*\*p<0.01.

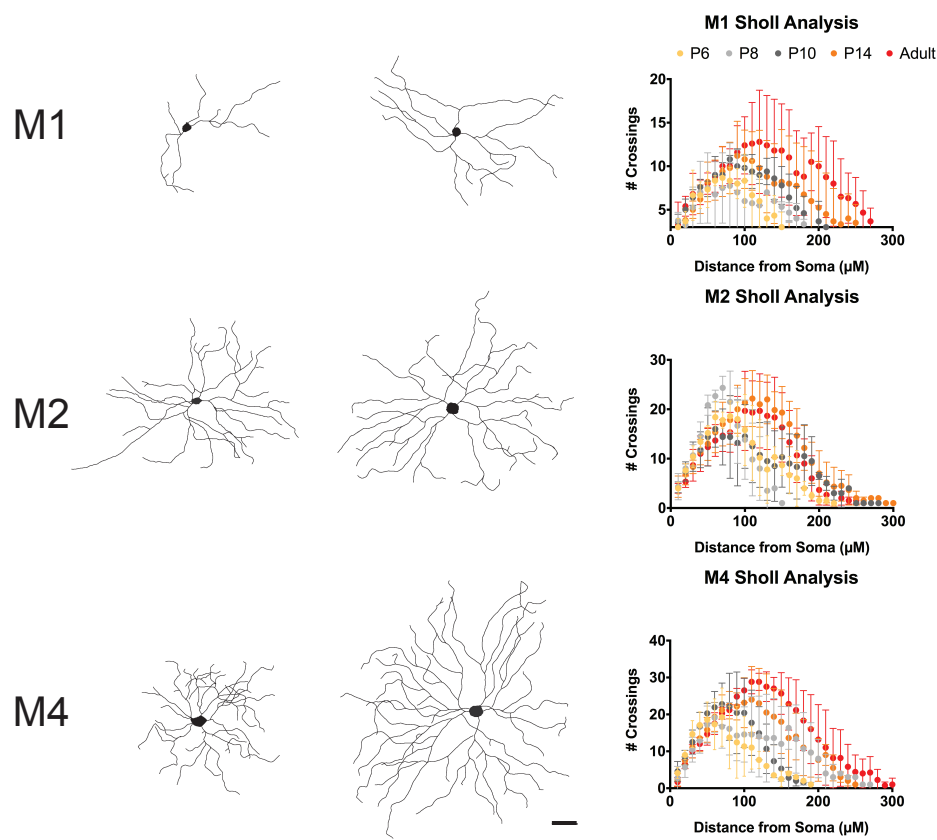

**Figure 4: M1 and M4 subtypes have large variation of morphology in adulthood.** Left, Representative cell tracings of small and large Adult cells for the M1, M2, and M4 subtypes. Right, Average Sholl analysis for M1, M2, and M4 subtypes at P6, P8, P10, P14, and Adult. Graphs are Mean  $\pm$  SD, n=5-8 per subtype/age. Scalebar is 50 $\mu\text{m}$ .

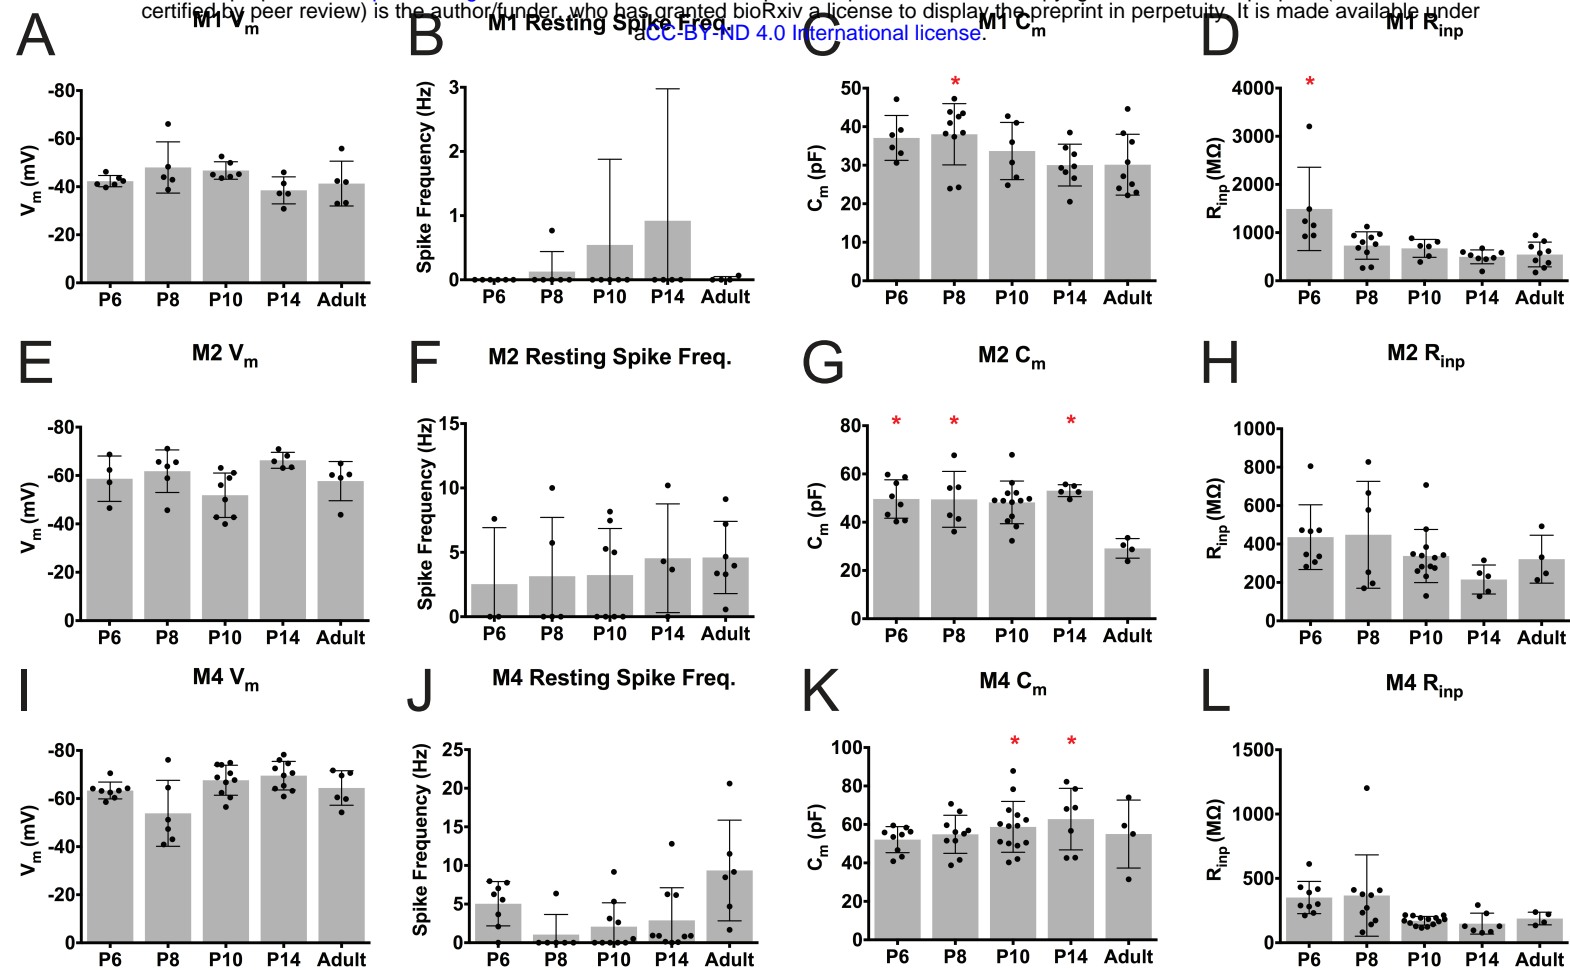

**Figure 5: Intrinsic physiological properties of ipRGC subtypes across development.** (A-D) Mean  $\pm$  SD M1 ipRGC resting membrane potential (A), spike frequency at rest (B), capacitance (C), and input resistance (D). (E-H) Mean  $\pm$  SD M2 ipRGC resting membrane potential (E), spike frequency at rest (F), capacitance (G), and input resistance (H). (I-L) Mean  $\pm$  SD M4 ipRGC resting membrane potential (I), spike frequency at rest (J), capacitance (K), and input resistance (L).  $n = 5-14$  per subtype/age \* $p < 0.05$  when compared to Adult time point.

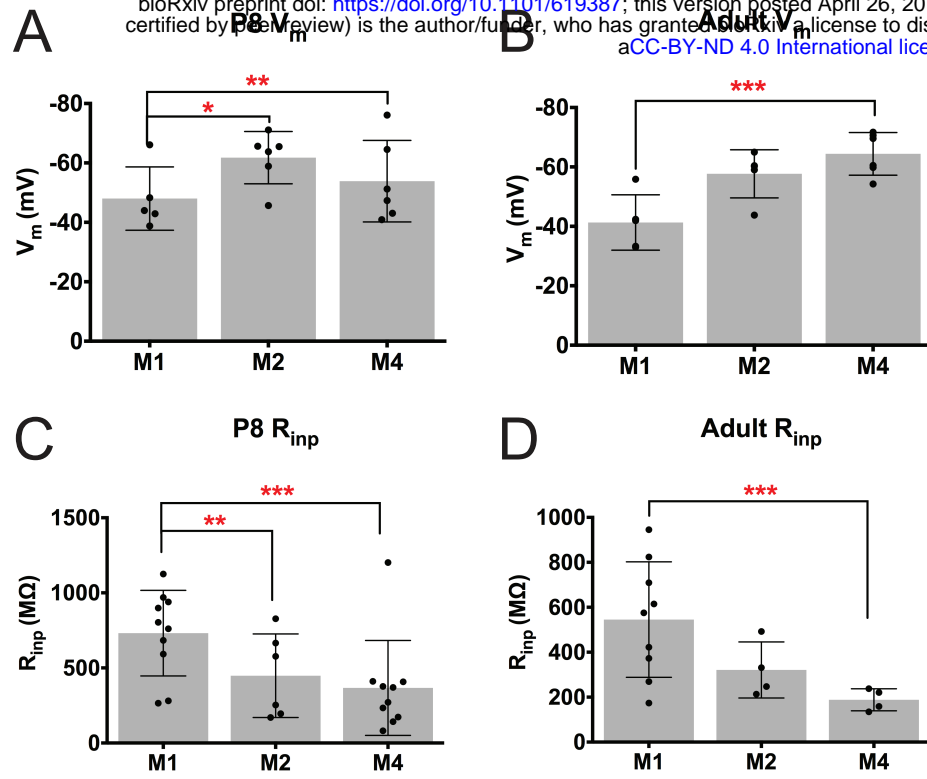

**Figure 6: ipRGC subtypes exhibit distinct intrinsic properties from early postnatal development.** (A-B) Mean  $\pm$  SD resting membrane potential at P8 (A) and Adult (B) for M1, M2, and M4 ipRGCs. (C-D) Mean  $\pm$  SD input resistance at P8 (C) and Adult (D) for M1, M2, and M4 ipRGCs.  $n = 5-14$  per subtype/age, \* $p < 0.05$ , \*\* $p < 0.01$ , \*\*\* $p < 0.001$ .

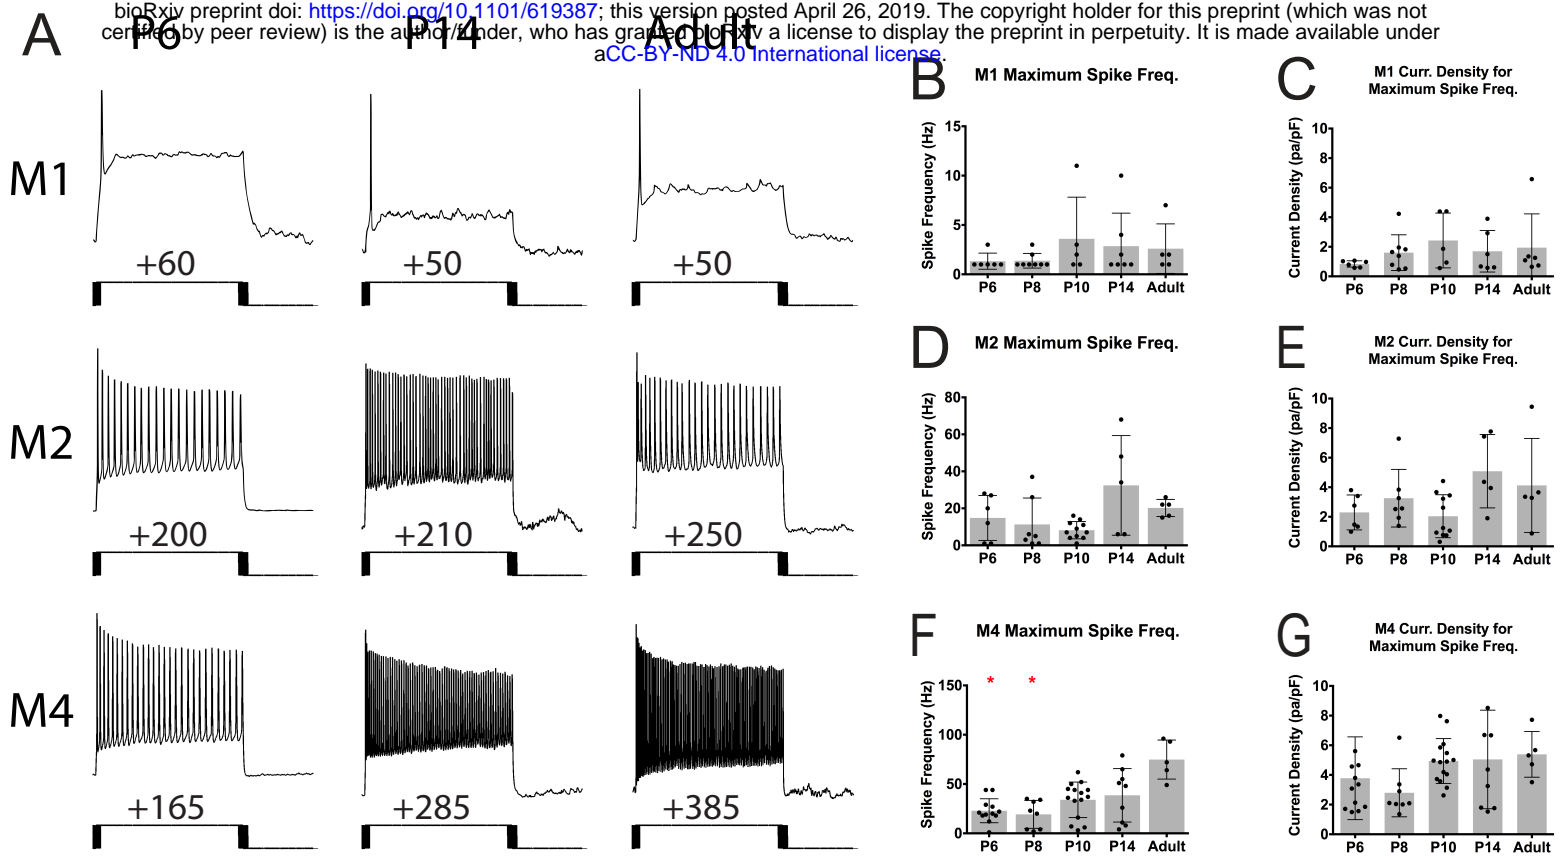

**Figure 7: ipRGC subtype excitability across development.** (A) Representative traces from depolarizing current injection that elicited the maximum spike output for M1, M2, and M4 subtypes at P6, P14, and Adult timepoints. (B-C) Maximum spike frequency elicited by depolarizing current steps (B) and maximum current density required to elicit maximum firing frequency (C) in M1 ipRGCs. (D-E) Maximum spike frequency elicited by depolarizing current steps (D) and maximum current density required to elicit maximum firing frequency (E) in M2 ipRGCs. (F-G) Maximum spike frequency elicited by depolarizing current steps (F) and maximum current density required to elicit maximum firing frequency (G) in M4 ipRGCs. Graphs are Mean  $\pm$  SD,  $n=5-14$  per subtype/age, \* $p<0.05$  when compared to Adult timepoint.

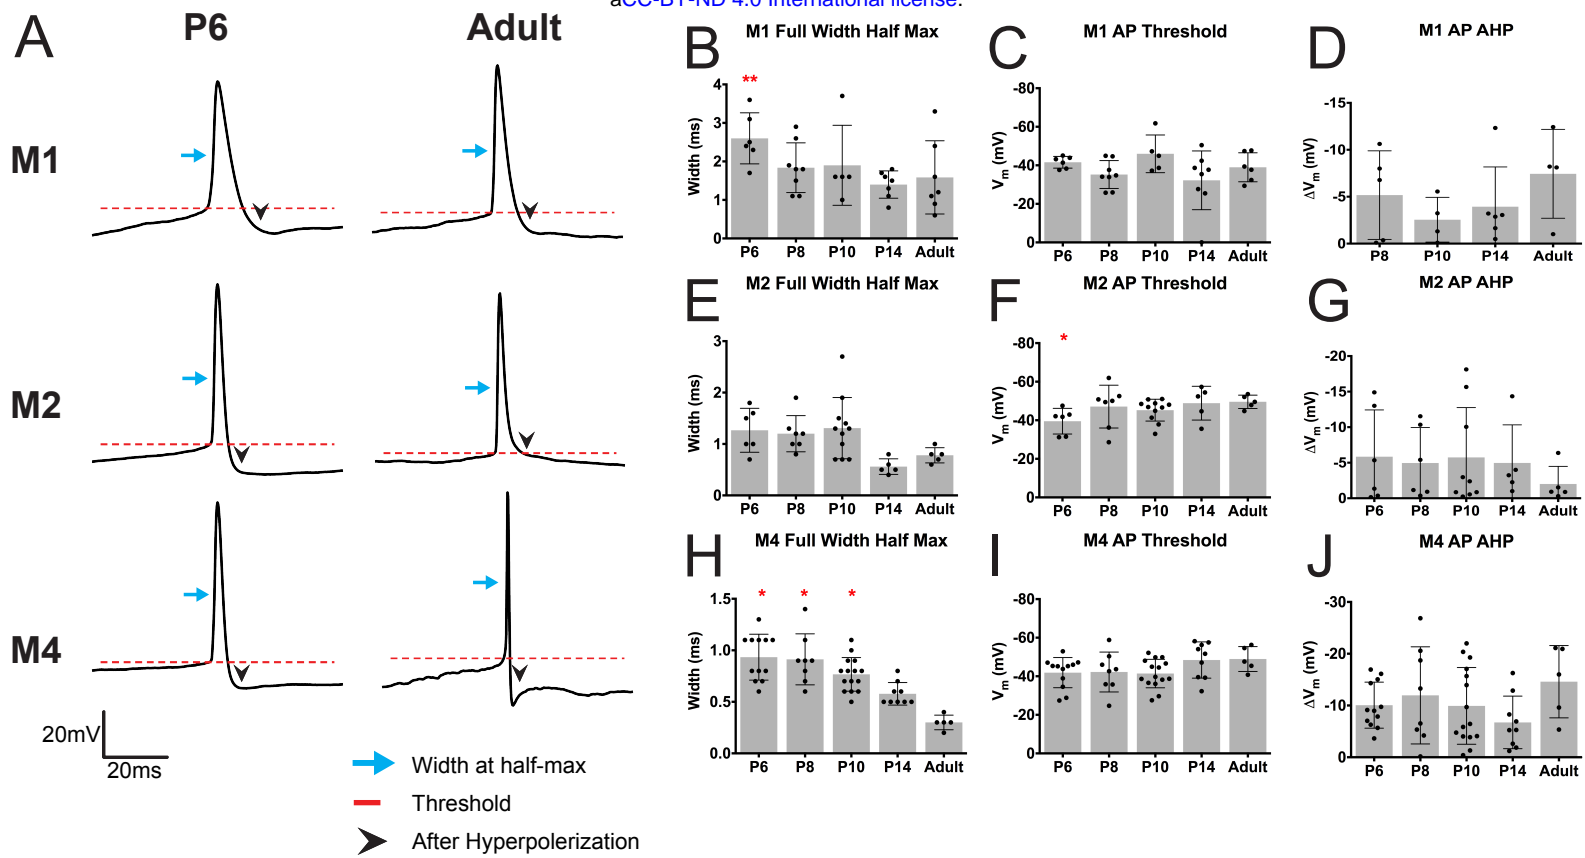

**Figure 8: Action potential properties of ipRGC subtypes across development.** (A) Representative traces of single action potentials for M1, M2, and M4 subtypes for P6 and Adult timepoints. (B-D) Measurement of M1 ipRGC AP full width at half max (B), AP threshold (C), and AP AHP (D). AP AHP P6 for M1 subtype is not plotted because cells did not hyperpolarize after action potential elicitation. (E-G) Measurement of M2 ipRGC AP full width at half max (E), AP threshold (F), and AP AHP (G). (H-J) Measurement of M4 ipRGC AP full width at half max (H), AP threshold (I), and AP AHP (J). Graphs are Mean  $\pm$  SD, n=5-14 per subtype/age, \*p<0.05 when compared to Adult timepoint. AP: action potential, AHP: after hyperpolarization. Blue arrow indicates width at half-max, red dotted line indicates threshold, and black arrowhead indicates after hyperpolarization.

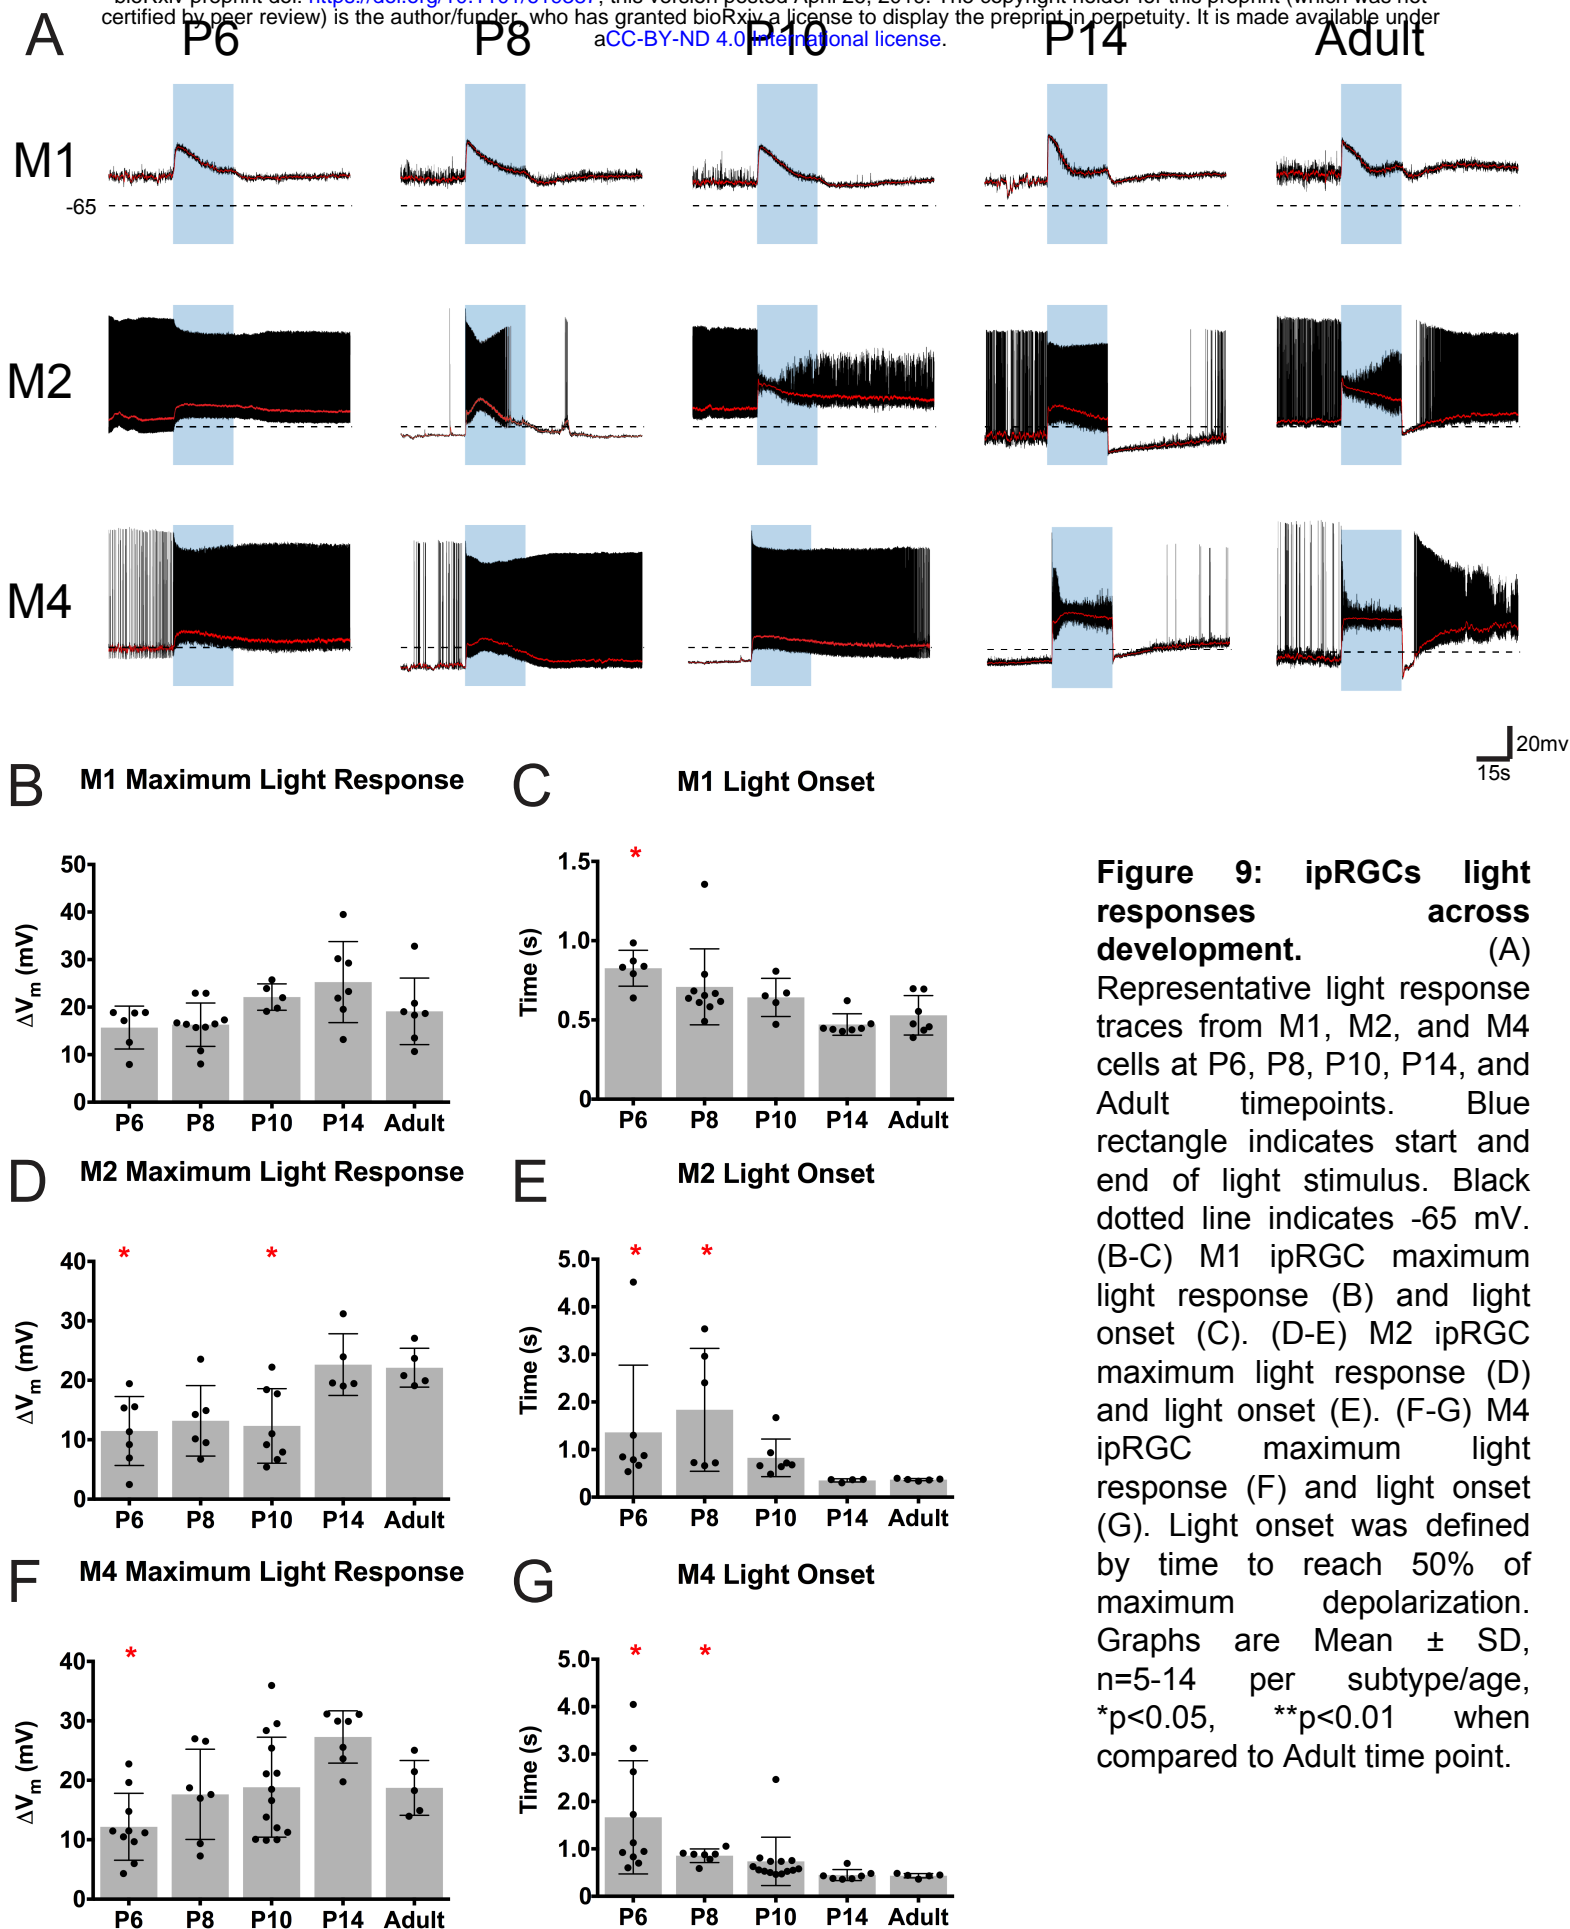

**Figure 9: ipRGCs light responses across development.**

(A) Representative light response traces from M1, M2, and M4 cells at P6, P8, P10, P14, and Adult timepoints. Blue rectangle indicates start and end of light stimulus. Black dotted line indicates -65 mV. (B-C) M1 ipRGC maximum light response (B) and light onset (C). (D-E) M2 ipRGC maximum light response (D) and light onset (E). (F-G) M4 ipRGC maximum light response (F) and light onset (G). Light onset was defined by time to reach 50% of maximum depolarization. Graphs are Mean ± SD, n=5-14 per subtype/age, \*p<0.05, \*\*p<0.01 when compared to Adult time point.



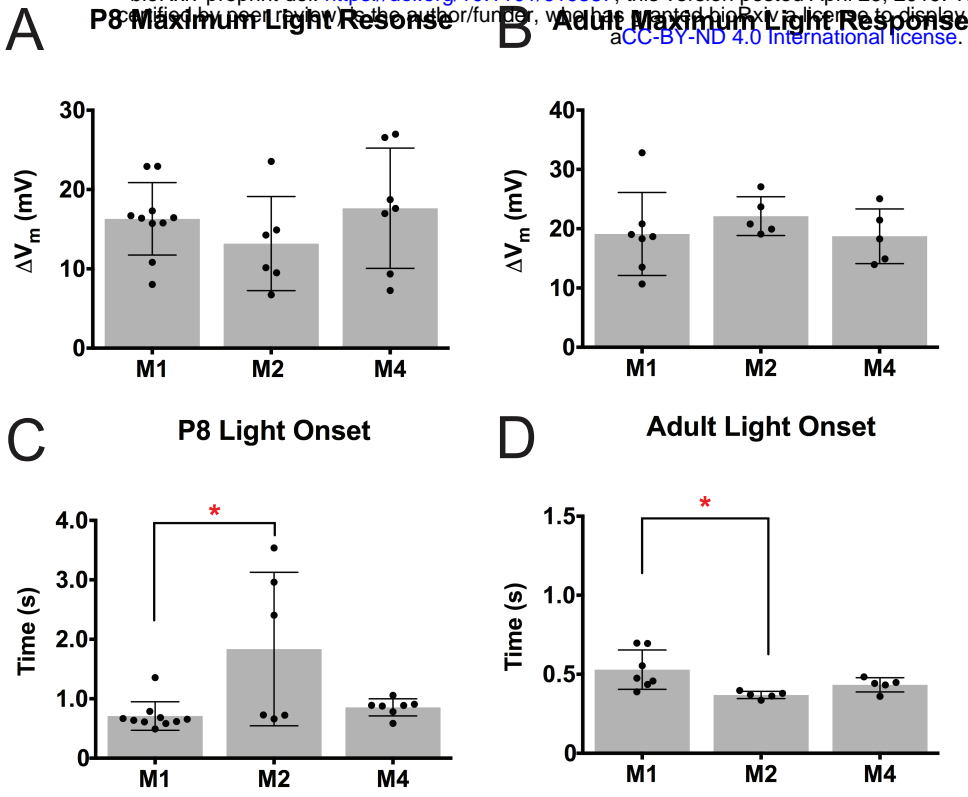

**Figure 10: Comparison of light response properties of ipRGC subtypes across development.** (A-B) Maximum light response of M1, M2, and M4 ipRGC subtypes at P8 (A) and Adult (B). (C-D) Light onset for M1, M2, and M4 ipRGC subtypes at P8 (C) and Adult (D). Light onset was defined by time to reach 50% of maximum depolarization. Graphs are Mean  $\pm$  SD, n=5-14 per subtype/age, \*p<0.05.

A

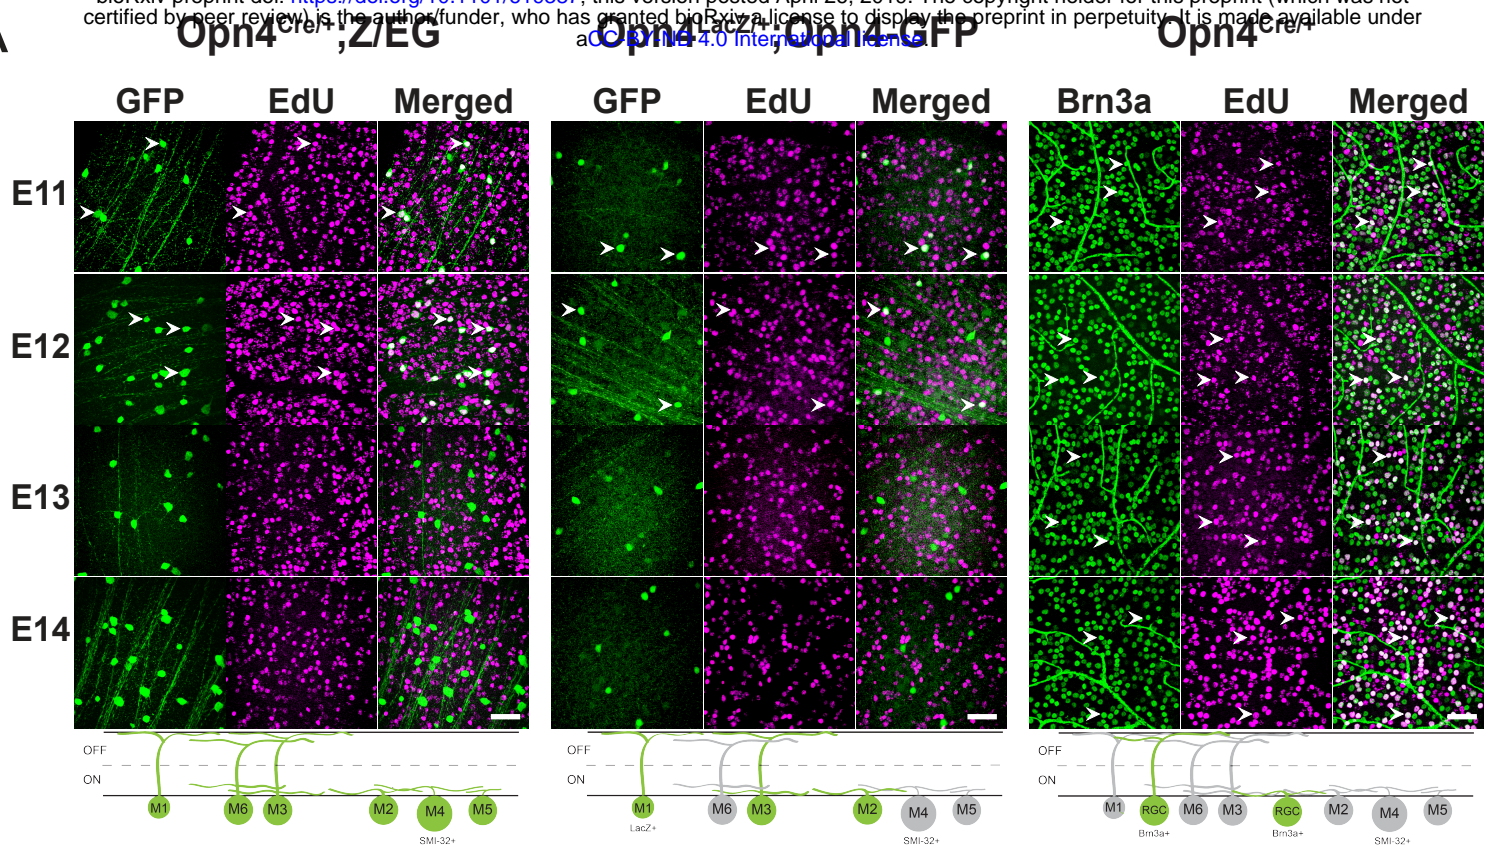

B

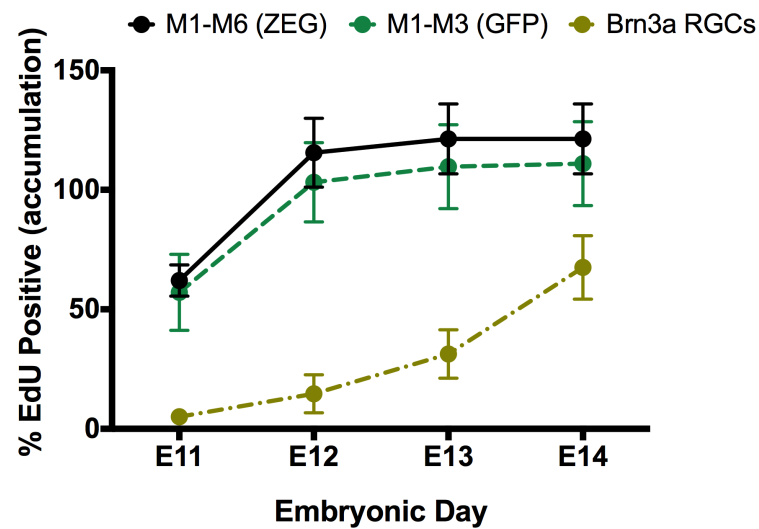

C

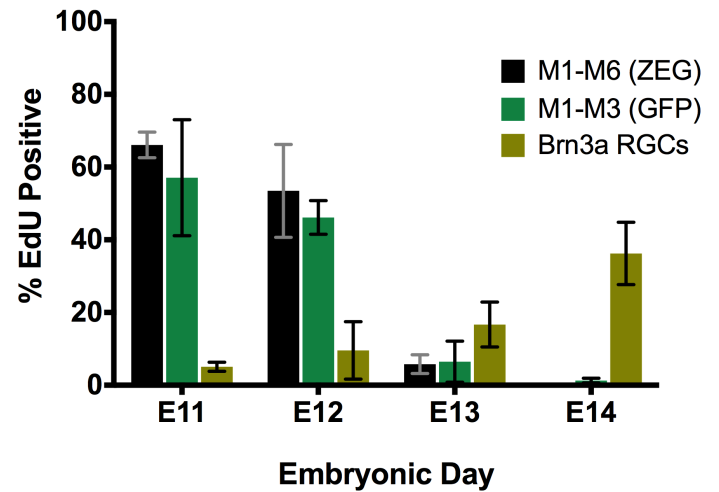

**Figure 11: ipRGCs are born earlier than Brn3a positive RGCs.** (A), Top, GFP or Brn3a immunohistochemistry (green) of retinas from Adult *Opn4Cre/+;ZEG*, *Opn4LacZ/+; Opn4-GFP* and *Opn4Cre/+* animals exposed to EdU (magenta) at different developmental stages. White arrow heads point to examples cells co-labeled with GFP or Brn3a and EdU. Bottom, Schematic of cell types labeled green in each experiment. (B) Accumulation plot of proportion of ipRGCs or Brn3a RGCs that are EdU positive when exposed to EdU at different embryonic timepoints. Accumulation was calculated based on adding together the proportion data calculated for each timepoint. (C) Proportion of ipRGCs or Brn3a RGCs that are EdU positive when exposed to EdU on specific embryonic day. Graphs are Mean  $\pm$  SD,  $n=3-4$  retinas per timepoint. Scale bar is 100 $\mu$ m.

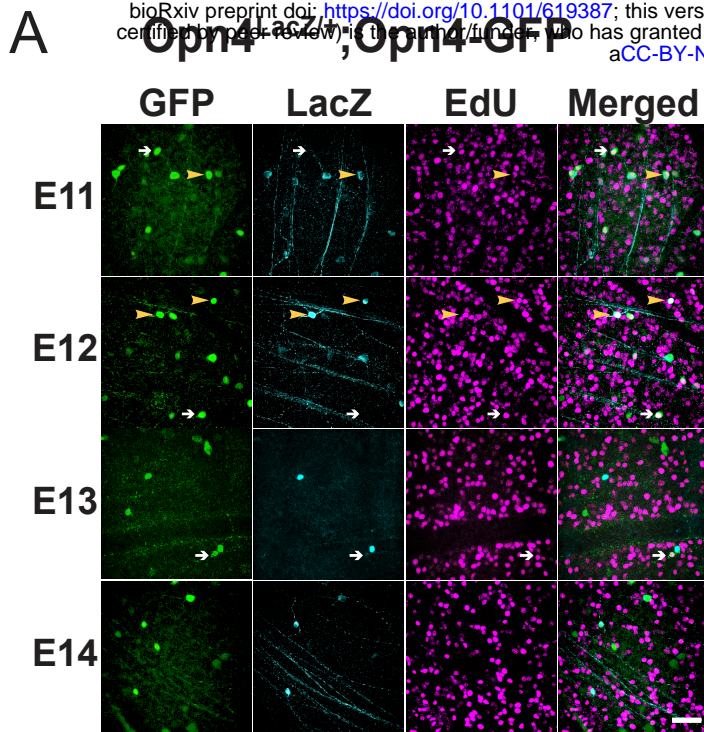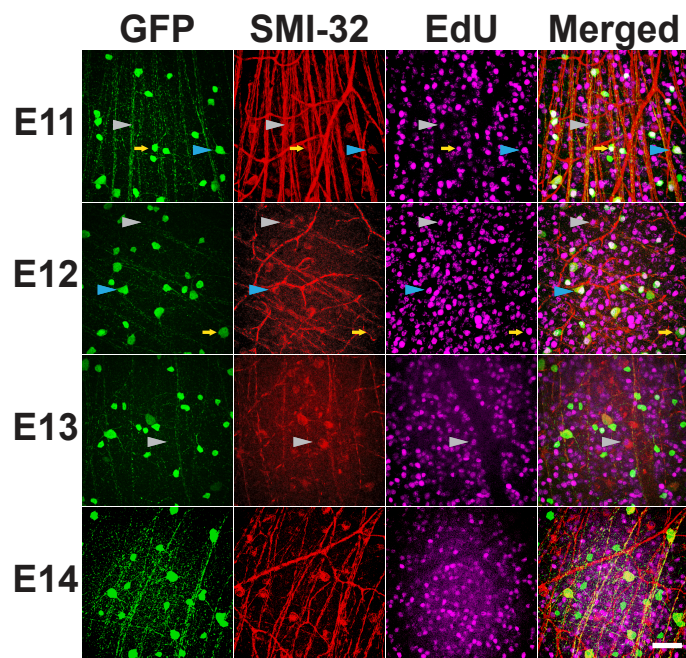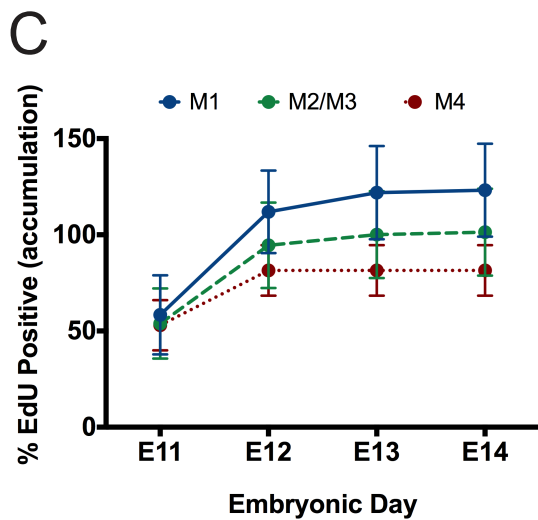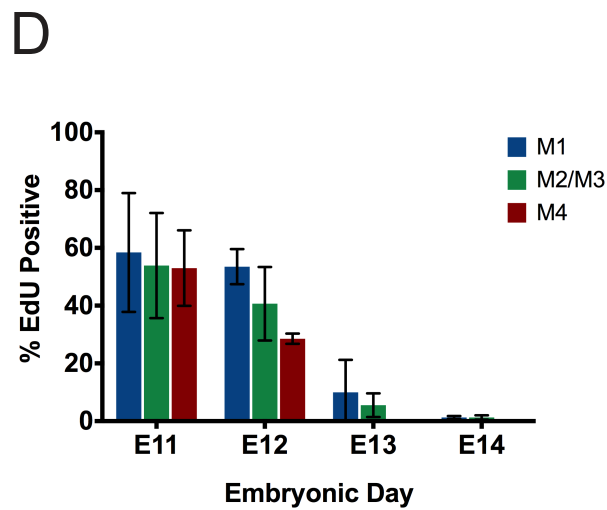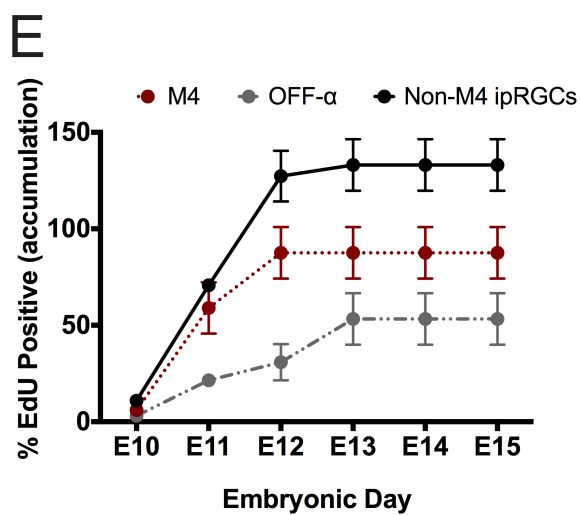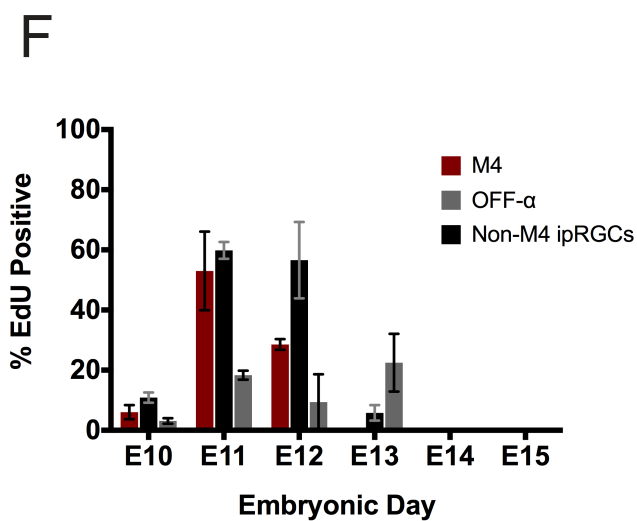

**Figure 12: ipRGC subtypes are born at the same rate and frequency.** (A) Top, GFP (green) and LacZ (cyan) immunohistochemistry in Adult *Opn4LacZ/+*; *Opn4-GFP* retinas labeled for EdU (magenta). Yellow arrowheads point to EdU positive M1 cells (GFP+, LacZ+) and white arrows to EdU-positive M2 cells (GFP+, LacZ-). Bottom, Schematic of ipRGC subtypes labeled with each marker in experiment. (B) GFP (green) and SMI-32 (red) immunohistochemistry in Adult *Opn4Cre/+*;ZEG retinas labeled for EdU (magenta). Blue arrowheads indicate EdU-positive M4 cells (GFP+, SMI-32+), yellow arrows indicate EdU positive non-M4 ipRGCs (GFP+, SMI-32-), and grey arrowheads indicate EdU positive OFF-alpha RGCs (GFP-, SMI-32+). Bottom, Schematic of ipRGC subtypes labeled with each marker in experiment. (C) Accumulation plot of proportion of ipRGC subtypes that are EdU positive when exposed to EdU at different embryonic timepoints. Accumulation was calculated based on adding together the proportion data calculated for each timepoint. (D) Proportion of ipRGC subtypes that are EdU positive when exposed to EdU at specific embryonic timepoints. (E) Accumulation plot of proportion of M4 ipRGCs, non-M4 ipRGCs, and OFF alpha RGCs that are EdU positive when exposed to EdU at different embryonic timepoints. Accumulation was calculated based on adding together the proportion data calculated for each timepoint. (F) Proportion of M4 ipRGCs, non-M4 ipRGCs, and OFF alpha RGCs that are EdU positive when exposed to EdU at specific embryonic timepoints. Graphs are Mean  $\pm$  SD, n=3-4 retinas per timepoint. Scale bar is 100 $\mu$ m.
